# Supplementary material for: A comparative study of patients’ activities and interactions in a stroke unit before and after reconstruction—The significance of the built environment
Source: PubMed Central journal article supplement (PMC5519004; doi:10.1371/journal.pone.0177477), 2017-07-20
Supplement: pone.0177477.s001.pdf [file pone.0177477.s001.pdf]

| TIME | Location | People | Activity |
|------|----------|--------|----------|
| 800  | 2        | 1      | 1        |
| 810  | 2        | 1      | 5,6      |
| 820  | 2        | 1      | 5,6      |
| 830  | 2        | 1      | 1        |
| 840  | 2        | 14     | 4        |
| 850  | 2        | 14     | 4        |
| 900  | 2        | 14     | 6        |
| 910  | 1        |        |          |
| 920  | 1        | 1      | 12,13    |
| 930  | 1        | 2      | 13       |
| 940  | 2        | 2,3,14 | 4,10     |
| 950  | 2        | 1      | 10       |
| 1000 | 1        | 1      | 12,13    |
| 1010 | 2        | 1      | 4,15,16  |
| 1020 | 2        | 1      | 4,10     |
| 1040 | 2        | 1      | 4,10     |
| 1050 | 2        | 1      | 13       |
| 1100 | 2        | 1      | 12,13    |
| 1110 | 2        | 14     | 4,10     |
| 1120 | 2        | 14     | 4,10     |
| 1130 | 2        | 14     | 10       |
| 1140 | 2        | 14     | 4,10     |
| 1150 | 2        | 14     | 4,10     |
| 1200 | 2        | 14     | 4,10     |
| 1210 | 2        | 14     | 4,10     |
| 1220 | 3        | 3,14   | 4,10     |
| 1230 | 3        | 3,14   | 4,10     |
| 1240 | 3        | 14     | 4,10     |
| 1250 | 3        | 14     | 4,10     |
| 1300 | 3        | 14     | 4,10     |
| 1310 | 2        | 1      | 5,10     |
| 1320 | 2        | 1      | 5,10     |
| 1340 |          |        | 17       |
| 1350 |          |        | 17       |
| 1400 |          |        | 17       |
| 1410 |          |        | 17       |
| 1420 |          |        | 17       |
| 1430 |          |        | 17       |
| 1440 |          |        | 17       |
| 1450 |          |        | 17       |
| 1500 |          |        | 17       |
| 1510 |          |        | 17       |
| 1520 |          |        | 17       |
| 1530 |          |        | 17       |
| 1540 |          |        | 17       |
| 1550 |          |        | 17       |
| 1600 |          |        | 17       |
| 1620 |          |        | 17       |
| 1630 |          |        | 17       |

|      |       |           |
|------|-------|-----------|
| 1640 |       | 17        |
| 1650 |       | 17        |
| 1700 |       | 17        |
| 800  | 2 1   | 1         |
| 810  | 2 1   | 1         |
| 820  | 2 1   | 12,15,16  |
| 830  | 1 1   | 12,13     |
| 840  | 1 1   | 12,13     |
| 850  | 2 3,5 | 4,12,13   |
| 900  | 2 14  | 5,10      |
|      |       | 5,10,15,1 |
| 910  | 2 14  | 6         |
| 920  | 2 14  | 4,10      |
| 930  | 2 14  | 4,10      |
|      |       | 4,12,15,1 |
| 940  | 2 1   | 6         |
| 950  | 3 1   | 4,12      |
| 1000 | 3 7   | 10        |
| 1010 | 2 1   | 10        |
| 1020 | 3 7   | 4,13      |
| 1040 | 2 1   | 1         |
| 1050 | 9     | 17        |
| 1100 | 9     | 17        |
| 1110 | 9     | 17        |
| 1120 | 9     | 17        |
| 1130 | 9     | 17        |
| 1140 | 9     | 17        |
| 1150 | 9     | 17        |
| 1200 | 3 1   | 1         |
| 1210 | 2 1   | 1         |
| 1220 | 2 1   | 1         |
| 1230 | 2 1   | 10        |
| 1240 | 2 1   | 5,10      |
| 1250 | 2 1   | 5,10      |
| 1300 | 2 2   | 4,10      |
| 1310 | 2 1   | 10        |
| 1320 | 2 1   | 13        |
| 1340 | 2 2   | 4,10      |
| 1350 | 2 10  | 4,10      |
| 1400 | 2 10  | 4,10      |
| 1410 | 2 10  | 1,4       |
| 1420 | 2 10  | 1,4       |
| 1430 | 2 10  | 1,4       |
| 1440 | 2 10  | 1,4       |
| 1450 | 2 10  | 1,4       |
| 1500 | 2 10  | 1,4       |
| 1510 | 2 10  | 1,4       |
| 1520 | 2 10  | 1,4       |
| 1530 | 2 10  | 1,4       |
| 1540 | 2 1   | 1         |

|      |        |         |
|------|--------|---------|
| 1550 | 2 1    | 1       |
| 1600 | 2 1    | 1       |
| 1620 | 2 1    | 13      |
| 1630 | 2 12   | 4,10    |
| 1640 | 2 10   | 4       |
| 1650 | 2 10   | 1,4     |
| 1700 | 2 10   | 1,4     |
| 800  | 2 1    | 5       |
| 810  | 2 1    | 5       |
| 820  | 2 1    | 5,6     |
| 830  | 2 3    | 5,6     |
| 840  | 2 3    | 5,6     |
| 850  | 2 1    | 6       |
| 900  | 1 3    | 4,7     |
| 910  | 1 3    | 4,7     |
| 920  | 2 3,4  | 4,7     |
| 930  | 2 3,5  | 1       |
| 940  | 2 1    | 1,12,13 |
| 950  | 2 1    | 1       |
| 1000 | 2 3,14 | 4       |
| 1010 |        | 17      |
| 1020 |        | 17      |
| 1040 |        | 17      |
| 1050 |        | 17      |
| 1100 |        | 17      |
| 1110 |        | 17      |
| 1120 |        | 17      |
| 1130 |        | 17      |
| 1140 |        | 17      |
| 1150 |        | 17      |
| 1200 |        | 17      |
| 1210 |        | 17      |
| 1220 |        | 17      |
| 1230 |        | 17      |
| 1240 |        | 17      |
| 1250 |        | 17      |
| 1300 |        | 17      |
| 1310 |        | 17      |
| 1320 |        | 17      |
| 1340 |        | 17      |
| 1350 |        | 17      |
| 1400 |        | 17      |
| 1410 |        | 17      |
| 1420 |        | 17      |
| 1430 |        | 17      |
| 1440 |        | 17      |
| 1450 |        | 17      |
| 1500 |        | 17      |
| 1510 |        | 17      |
| 1520 |        | 17      |

|      |        |           |
|------|--------|-----------|
| 1530 |        | 17        |
| 1540 |        | 17        |
| 1550 |        | 17        |
| 1600 |        | 17        |
| 1620 |        | 17        |
| 1630 |        | 17        |
| 1640 |        | 17        |
| 1650 |        | 17        |
| 1700 |        | 17        |
| 800  | 2 1    | 5         |
| 810  | 2 1    | 5         |
|      |        | 5,10,15,1 |
| 820  | 2 1    | 6         |
| 830  | 1 1    | 12,13     |
| 840  | 1 1    | 12,13     |
| 850  | 2 8    | 4,10      |
| 900  | 2 1    | 12,13     |
| 910  | 2 1    | 10        |
| 920  | 3 9    | 4,13      |
| 930  | 2 1    | 10        |
| 940  | 1 1    | 17        |
| 950  | 2 1    | 10        |
| 1000 | 2 1    | 10        |
|      |        | 4,12,13,1 |
| 1010 | 4 8,12 | 5,16      |
|      |        | 4,12,13,1 |
| 1020 | 4 8,12 | 5,16      |
| 1040 | 4 8    | 4,12,13   |
| 1050 | 4 8    | 4,12,13   |
| 1100 | 2 9    | 4,10      |
| 1110 | 2 9    | 4,10      |
| 1120 | 2 9    | 4,10      |
| 1130 | 2 9    | 4,10      |
| 1140 | 2 9    | 4,10      |
| 1150 | 2 1    | 10        |
| 1200 | 2 1    | 10        |
| 1210 | 2 1    | 1         |
| 1220 | 2 1    | 1         |
| 1230 | 2 1    | 10        |
| 1240 | 2 1    | 10        |
| 1250 | 2 1    | 5,10      |
| 1300 | 2 1    | 4,5,10    |
| 1310 | 2 3    | 4,5,10    |
| 1320 | 2 14   | 4,10      |
| 1340 | 2 14   | 4,10      |
| 1350 | 2 10   | 4,10      |
| 1400 | 2 10   | 4,10      |
| 1410 | 1 1    | 10,12,13  |
| 1420 | 2 5,10 | 4,10      |
| 1430 |        | 17        |

|      |      |           |
|------|------|-----------|
| 1440 |      | 17        |
| 1450 |      | 17        |
| 1500 |      | 17        |
| 1510 |      | 17        |
| 1520 |      | 17        |
| 1530 |      | 17        |
| 1540 |      | 17        |
| 1550 |      | 17        |
| 1600 |      | 17        |
| 1620 |      | 17        |
| 1630 |      | 17        |
| 1640 |      | 17        |
| 1650 |      | 17        |
| 1700 |      | 17        |
| 800  | 5 1  | 1,7       |
| 810  | 2 3  | 4         |
|      |      | 5,10,15,1 |
| 820  | 5 1  | 6         |
| 830  | 5 1  | 10        |
| 840  | 3 1  | 12,13     |
| 850  | 3 1  | 13        |
| 900  | 5 1  | 4,10      |
| 910  | 5 1  | 4,10      |
| 920  | 5 1  | 4,10      |
| 930  | 5 1  | 4,10      |
| 940  | 5 1  | 4,10      |
| 950  | 5 1  | 4,10      |
| 1000 | 5 1  | 4         |
| 1010 | 10   | 17        |
| 1020 | 10   | 17        |
| 1040 | 10   | 17        |
| 1050 | 9    | 17        |
| 1100 | 9    | 17        |
| 1110 | 9    | 17        |
| 1120 | 9    | 17        |
| 1130 | 9    | 17        |
| 1140 | 9    | 17        |
| 1150 | 9    | 17        |
| 1200 | 2 1  | 10        |
| 1210 | 5 1  | 10        |
| 1220 | 5 14 | 4,10      |
| 1230 | 5 14 | 5,10      |
| 1240 | 5 14 | 4,5,10    |
| 1250 | 5 14 | 5,10      |
| 1300 | 2 1  | 1         |
| 1310 | 3 1  | 13        |
| 1320 |      | 17        |
| 1340 |      | 17        |
| 1350 |      | 17        |
| 1400 |      | 17        |

|      |        |            |
|------|--------|------------|
| 1410 |        | 17         |
| 1420 |        | 17         |
| 1430 | 3 10   | 4,13       |
| 1440 | 2 2,10 | 4,10       |
| 1450 | 2 10   | 4,10       |
| 1500 | 2 10   | 4,10       |
| 1510 | 3 10   | 13         |
| 1520 |        | 17         |
| 1530 |        | 17         |
| 1540 |        | 17         |
| 1550 |        | 17         |
| 1600 |        | 17         |
| 1620 |        | 17         |
| 1630 |        | 17         |
| 1640 |        | 17         |
| 1650 |        | 17         |
| 1700 |        | 17         |
| 800  | 2 1    | 1          |
| 810  | 2 1    | 1          |
| 820  | 2 1    | 1          |
| 830  | 2 1    | 1          |
| 840  | 2 5    | 4,7,15,16  |
|      |        | 4,10,15,1  |
| 850  | 2 5    | 6          |
|      |        | 4,5,10,15, |
| 900  | 5 5    | 16         |
| 910  | 5 14   | 4,10       |
| 920  | 5 5,14 | 4,5,10     |
| 930  | 5 14   | 4,10       |
| 940  | 2 12   | 3,4,10     |
| 950  | 2 12   | 4,10       |
|      |        | 4,10,15,1  |
| 1000 | 2 1    | 6          |
| 1010 | 2 1    | 4          |
| 1020 | 2 1    | 1          |
| 1030 | 2 1    | 1          |
| 1040 | 2 1    | 1          |
| 1050 | 2 1    | 1          |
| 1100 | 2 1    | 1          |
| 1110 | 2 1    | 1          |
| 1120 | 2 1    | 4          |
| 1130 | 2 1    | 1          |
| 1140 | 5 1    | 10         |
| 1200 | 5 14   | 4,10       |
|      |        | 5,10,15,1  |
| 1210 | 5 14   | 6          |
| 1220 | 5 1    | 5,10       |
| 1230 | 5 1    | 5,10       |
| 1240 | 5 1    | 5,10       |
| 1250 | 5 14   | 4,10       |

|      |         |           |
|------|---------|-----------|
| 1300 | 1 5     | 10,13     |
| 1310 | 6 2,10  | 4,10      |
| 1320 | 6 2,10  | 4,10      |
| 1330 | 5 10    | 4,10      |
| 1340 | 5 10    | 4,10      |
| 1350 | 5 10    | 4,10      |
| 1400 | 2 3     | 4,12      |
| 1410 | 2 1     | 4,10      |
| 1420 | 2 1     | 4,10      |
| 1430 | 2 1     | 4,10      |
| 1450 | 2 1     | 4,10      |
| 1500 | 2 1     | 4,10      |
| 1510 | 2 1     | 1         |
| 1520 | 2 1     | 1         |
| 1530 | 2 1     | 1         |
| 1550 | 2 1     | 1         |
| 1600 | 2 1     | 1         |
| 1610 | 2 1     | 1         |
| 1620 | 2 1     | 1         |
| 800  | 2 1     | 1         |
| 810  | 2 1     | 1         |
| 820  | 2 1     | 1         |
| 830  | 1 5     | 1         |
| 840  | 2 1     | 1         |
| 850  | 2 5     | 1         |
| 900  | 2 5,6   | 4,9       |
| 910  | 2 5     | 7         |
| 920  | 2 5     | 7,15,16   |
| 930  | 5 5     | 5,7,15,16 |
| 940  | 5 5     | 4,7,15,16 |
| 950  | 3 5     | 7         |
| 1000 | 3 1     | 7         |
| 1010 | 3 1     | 7         |
| 1020 | 3 1     | 7         |
| 1030 | 3 1     | 7         |
| 1040 | 2 3,5,6 | 7,12      |
| 1050 | 9       | 17        |
| 1100 | 9       | 17        |
| 1110 | 9       | 17        |
| 1120 | 3 1     | 1         |
| 1130 | 3 3,5,6 | 1         |
| 1140 | 2 1     | 1         |
| 1200 | 2 1     | 1         |
| 1210 | 5 1     | 7         |
| 1220 | 5 1     | 5,7       |
| 1230 | 5 1     | 5,7       |
| 1240 | 5 5     | 5,7       |
| 1250 | 5 5     | 4,5,7     |
| 1300 | 5 1     | 7         |
| 1310 | 5 1     | 7         |

|      |        |           |
|------|--------|-----------|
| 1320 | 2 1    | 1         |
| 1330 | 2 1    | 1         |
| 1340 | 2 1    | 1         |
| 1350 | 2 1    | 15,16     |
| 1400 | 2 1    | 1         |
| 1410 | 2 1    | 1         |
| 1420 | 2 1    | 1         |
| 1430 | 2 1    | 1         |
| 1450 | 5 9    | 5,7       |
| 1500 | 5 9    | 5,7       |
| 1510 | 5 9    | 5,7       |
| 1520 | 5 10   | 4,7       |
| 1530 | 5 3,10 | 4,7       |
| 1550 | 5 10   | 4,7       |
| 1600 | 5 10   | 4,7       |
| 1610 | 5 10   | 4,7       |
| 1620 | 5 10   | 4,7       |
| 800  | 2 5    | 12,15,16  |
| 810  | 2 5    | 12,15,16  |
| 820  | 3 5    | 4,7,15,16 |
| 830  | 3 1    | 4,7       |
| 840  | 2 1    | 7,15,16   |
| 850  |        | 17        |
| 900  | 3 1    | 7         |
| 910  | 2 1    | 4,7       |
| 920  | 2 1    | 4,7       |
| 930  | 2 1    | 4,7       |
| 940  | 4 7    | 4,7,15,16 |
|      |        | 4,12,15,1 |
| 950  | 4 7    | 6         |
|      |        | 4,12,15,1 |
| 1000 | 4 7    | 6         |
| 1010 | 4 7    | 4,15,16   |
| 1020 | 4 7    | 4,15,16   |
|      |        | 4,12,13,1 |
| 1030 | 4 7    | 5,16      |
| 1040 | 3 7    | 4,13      |
| 1050 | 2 1    | 7         |
| 1100 | 2 1    | 4,7       |
| 1110 | 2 2    | 4,7       |
| 1120 | 2 1    | 4,7       |
| 1130 | 2 1    | 4,7       |
| 1140 | 5 1    | 4,7       |
| 1200 | 2 1    | 4,7       |
| 1210 | 5 1    | 5,7       |
| 1220 | 5 1    | 5,7       |
| 1230 | 5 1    | 5,7       |
| 1240 | 5 1    | 5,7       |
| 1250 | 2 1    | 4,7       |
| 1300 | 2 1    | 4,7       |



|      |        |           |
|------|--------|-----------|
| 1310 | 2 1    | 4,7       |
| 1320 | 2 1    | 4,7       |
| 1330 | 2 1    | 4         |
| 1340 | 2 1    | 4         |
| 1350 | 1 5    | 4,7,12    |
| 1400 | 2 1    | 1         |
| 1410 | 2 1    | 1         |
| 1420 | 2 1    | 1         |
| 1430 | 2 1    | 1         |
| 1450 | 2 1    | 1         |
| 1500 | 2 1    | 1         |
| 1510 | 2 1    | 1         |
| 1520 | 2 12   | 4         |
| 1530 | 2 7    | 4,10      |
| 1550 | 2 1    | 1         |
| 1600 | 2 1    | 1         |
| 1610 | 2 1    | 1         |
| 1620 | 2 1    | 1         |
|      |        | 4,10,15,1 |
| 800  | 5 1    | 6         |
|      |        | 5,10,15,1 |
| 810  | 5 1    | 6         |
|      |        | 5,10,15,1 |
| 820  | 5 1    | 6         |
| 830  | 5 1    | 10        |
| 840  | 5 1    | 7,15,16   |
| 850  | 3 1    | 7         |
| 900  | 2 12   | 4         |
| 910  | 3 1    | 13        |
| 920  | 2 1    | 1         |
| 930  | 2 1    | 1         |
| 940  | 2 1    | 1         |
| 950  | 2 1    | 1         |
| 1000 | 2 1    | 1         |
| 1010 | 2 1    | 1         |
| 1020 | 2 9    | 4,7       |
| 1030 | 2 9    | 4,7       |
| 1040 | 2 9    | 4,7       |
| 1050 | 3 1    | 4,7       |
| 1100 | 4 8,12 | 4,7       |
| 1110 | 4 8    | 4,7       |
| 1120 | 4 8,12 | 4,7       |
| 1130 | 2 1    | 1         |
| 1140 | 2 1    | 1         |
| 1200 | 2 1    | 1         |
| 1210 | 5 1    | 5,7       |
| 1220 | 5 1    | 5,7       |
| 1230 | 5 1    | 5,7       |
| 1240 | 3 1    | 7         |
| 1250 | 3 1    | 7         |

|      |        |            |
|------|--------|------------|
| 1300 | 4 7,12 | 4,7,15,16  |
| 1310 | 4 7,12 | 4,7,12     |
| 1320 | 4 7,12 | 4,10,12    |
|      |        | 4,10,15,1  |
| 1330 | 4 7    | 6          |
| 1340 | 3 7    | 4,7        |
| 1350 | 2 1    | 1          |
| 1400 | 2 1    | 1          |
| 1410 | 2 1    | 1          |
| 1420 | 2 1    | 1          |
| 1430 | 2 1    | 1          |
| 1450 | 2 1    | 1          |
| 1500 | 2 1    | 1          |
| 1510 | 2 1    | 1          |
| 1520 | 2 1    | 1          |
| 1530 | 2 1    | 1          |
| 1550 | 2 1    | 1          |
| 1600 | 2 1    | 1          |
| 1610 | 2 1    | 1          |
| 1620 | 2 1    | 1          |
| 800  | 1 5    | 10,15,16   |
| 810  | 1 5    | 10,15,16   |
| 820  | 2 5,6  | 4,15,16    |
|      |        | 4,10,15,1  |
| 830  | 2 5,6  | 6          |
|      |        | 4,5,10,15, |
| 840  | 5 14   | 16         |
| 850  | 5 14   | 4,10       |
| 900  | 5 14   | 4,10       |
| 910  | 2 1    | 1          |
| 920  | 2 12   | 4          |
| 930  | 2 12   | 4          |
| 940  | 2 1    | 1          |
| 950  | 2 1    | 1          |
| 1000 | 2 1    | 1          |
| 1010 | 2 1    | 1          |
| 1020 | 2 1    | 4,15,16    |
| 1030 | 2 5    | 4,15,16    |
|      |        | 4,10,15,1  |
| 1040 | 2 5,6  | 6          |
| 1050 | 3 7    | 4          |
| 1100 | 3 1    | 1          |
| 1110 | 3 1    | 1          |
| 1120 | 3 1    | 1          |
| 1130 | 3 1    | 1          |
| 1140 | 3 1    | 1          |
| 1200 | 3 5    | 13         |
| 1210 | 5 1    | 5,10       |
| 1220 | 5 1    | 5,10       |
| 1230 | 5 1    | 5,10       |

|      |       |      |
|------|-------|------|
| 1240 | 5 1   | 5,10 |
| 1250 | 3 1   | 1    |
| 1300 | 3 1   | 1    |
| 1310 | 3 1   | 1    |
| 1320 | 3 1   | 1    |
| 1330 | 3 5   | 13   |
| 1340 |       | 17   |
| 1350 |       | 17   |
| 1400 |       | 17   |
| 1410 |       | 17   |
| 1420 |       | 17   |
| 1430 |       | 17   |
| 1450 |       | 17   |
| 1500 |       | 17   |
| 1510 |       | 17   |
| 1520 |       | 17   |
| 1530 |       | 17   |
| 1550 |       | 17   |
| 1600 |       | 17   |
| 1610 |       | 17   |
| 1620 |       | 17   |
| 800  |       | 17   |
| 810  |       | 17   |
| 820  |       | 17   |
| 830  | 2 3,4 | 4,7  |
| 840  | 2 3,4 | 4,7  |
| 850  | 2 3,4 | 4,7  |
| 900  | 2 10  | 4,7  |
| 910  | 2 10  | 4,7  |
| 920  | 2 10  | 4,7  |
| 930  | 2 10  | 4,7  |
| 940  | 2 10  | 4,7  |
| 950  | 2 10  | 4,7  |
| 1000 | 2 10  | 4,7  |
| 1010 | 2 10  | 4,7  |
| 1020 | 2 10  | 4,7  |
| 1030 | 2 10  | 4,7  |
| 1040 | 2 10  | 4,7  |
| 1050 | 2 10  | 4,7  |
| 1100 | 2 10  | 4,7  |
| 1110 | 2 10  | 4,7  |
| 1120 | 2 7   | 4,7  |
| 1130 | 2 7   | 4,7  |
| 1140 | 2 7   | 4,7  |
| 1150 | 2 7   | 4,7  |
| 1210 | 2 1   | 1    |
| 1220 | 2 5   | 4    |
| 1230 | 2 1   | 1    |
| 1240 | 2 1   | 1    |
| 1250 | 2 1   | 1    |

|      |        |           |
|------|--------|-----------|
| 1300 | 2 1    | 1         |
| 1310 | 2 1    | 1         |
| 1320 | 1 1    | 1         |
| 1330 | 2 1    | 1         |
| 1340 | 2 1    | 1         |
| 1350 | 2 1    | 1         |
| 1400 | 2 1    | 1         |
| 1410 | 2 5,6  | 4,7       |
| 1420 | 4 9    | 4,7       |
| 1430 | 4 9    | 4,7       |
| 1440 | 4 9    | 4,7       |
| 1450 | 3 9    | 7         |
| 1510 | 5 1    | 4,7,15,16 |
| 1520 | 5 1    | 4,7,15,16 |
| 1530 | 5 1    | 4,7       |
| 1540 | 5 1    | 4,7       |
| 1550 | 5 1    | 4,7       |
| 1600 | 2 3,5  | 4,7       |
| 1610 | 2 1    | 1         |
| 1620 | 2 1    | 1         |
| 1630 | 2 1    | 1         |
| 1640 | 2 1    | 1         |
| 1650 | 2 1    | 1         |
| 1700 | 2 1    | 1         |
| 800  |        | 17        |
| 810  |        | 17        |
| 820  |        | 17        |
| 830  | 3 1    | 10        |
| 840  | 3 1    | 10        |
| 850  | 3 1    | 10        |
| 900  | 3 1    | 10        |
| 910  | 4 9,12 | 4,10      |
| 920  | 4 9    | 4,10      |
| 930  | 4 9,12 | 4,10      |
| 940  | 4 9,12 | 4,10      |
| 950  | 4 9    | 4,10      |
| 1000 | 4 9    | 4,10      |
| 1010 | 4 9    | 4,10      |
| 1020 | 4 9    | 4,10      |
| 1030 | 4 9    | 4,10      |
| 1040 | 4 9    | 4,10      |
| 1050 | 4 9    | 4,10      |
| 1100 | 4 7    | 4,12,13   |
|      |        | 4,10,12,1 |
| 1110 | 4 7    | 3         |
| 1120 | 3 7    | 13        |
|      |        | 4,10,15,1 |
| 1130 | 2 7    | 6         |
|      |        | 4,10,15,1 |
| 1140 | 2 7    | 6         |

|      |       |           |
|------|-------|-----------|
| 1150 | 2 7   | 4,10      |
| 1210 | 5 1   | 10        |
| 1220 | 5 1   | 4,10      |
| 1230 | 5 1   | 5,10      |
| 1240 | 2 1   | 10        |
| 1250 | 2 1   | 1         |
| 1300 | 2 1   | 1         |
| 1310 | 2 1   | 1         |
| 1320 | 1 1   | 12        |
| 1330 | 2 1   | 1         |
| 1340 | 2 1   | 1         |
| 1350 | 2 1   | 10        |
| 1400 | 5 1   | 5,10      |
| 1410 | 4 8   | 4,10      |
| 1420 | 4 8   | 4,10      |
| 1430 | 4 8   | 4,10      |
|      |       | 4,10,15,1 |
| 1440 | 4 8   | 6         |
| 1450 | 4 8   | 4,10      |
| 1510 | 2 1   | 4         |
| 1520 | 2 1   | 4         |
| 1530 | 2 1   | 4         |
| 1540 | 2 1   | 4         |
| 1550 | 2 1   | 4         |
| 1600 | 2 1   | 4,10      |
| 1610 | 2 1   | 4,10      |
| 1620 | 2 1   | 4,10      |
| 1630 | 2 1   | 1         |
| 1640 | 2 1   | 1         |
| 1650 | 2 1   | 4,10      |
| 1700 | 2 1   | 4,10      |
| 800  |       | 17        |
| 810  |       | 17        |
| 820  |       | 17        |
| 830  | 2 5,6 | 4         |
| 840  | 2 5,6 | 12        |
| 850  | 2 5,6 | 4,12      |
| 900  | 1 1   | 7         |
| 910  | 1 5   | 4,7       |
| 920  | 1 5   | 4,7       |
| 930  | 1 5   | 4,7       |
| 940  | 2 5   | 4         |
| 950  | 3 5   | 4,5,7     |
| 1000 | 5 1   | 5,7       |
| 1010 | 10 13 | 4,7       |
| 1020 | 10 13 | 4,7       |
| 1030 | 2 1   | 7,15,16   |
| 1040 | 1 1   | 7         |
| 1050 | 3 5   | 4,7       |
| 1100 | 5 1   | 7         |

|      |       |           |
|------|-------|-----------|
| 1110 | 3 1   | 7         |
| 1120 | 3 1   | 2,7       |
| 1130 | 3 1   | 2,7       |
| 1140 | 3 1   | 2,7       |
| 1150 | 3 1   | 2,7       |
| 1210 | 1 5   | 7         |
| 1220 | 5 1   | 4         |
| 1230 | 5 1   | 2,5,7     |
| 1240 | 3 1   | 2,7       |
| 1250 | 3 1   | 2,7       |
| 1300 | 3 8   | 2,4,7     |
| 1310 | 4 7,8 | 4,7,12    |
| 1320 | 4 7,8 | 4,12      |
| 1330 | 4 7,8 | 4,12      |
| 1340 | 4 7,8 | 4,7       |
| 1350 | 3 10  | 4,7,15,16 |
| 1400 | 5 1   | 2,5,7,11  |
| 1410 | 3 1   | 2,7,11    |
| 1420 | 3 1   | 2,7,11    |
| 1430 | 10    | 17        |
| 1440 | 3 1   | 2,7,11    |
| 1450 | 3 1   | 2,7,11,15 |
| 1510 | 2 1   | 2,7,11    |
| 1520 | 1 5   | 2,7,12    |
| 1530 | 3 1   | 2,7,11    |
| 1540 | 3 1   | 2,7,11,15 |
| 1550 | 3 1   | 2,7,11    |
| 1600 | 5 1   | 2,7,11,15 |
| 1610 | 3 1   | 2,7,11,15 |
| 1620 | 3 1   | 2,7,11    |
| 1630 | 3 1   | 2,7,11,15 |
| 1640 | 5 1   | 2,7       |
| 1650 | 5 1   | 2,7       |
| 1700 | 5 1   | 2,7       |
| 800  |       | 17        |
| 810  |       | 17        |
| 820  |       | 17        |
| 830  | 3 1   | 7         |
| 840  | 3 1   | 7         |
| 850  |       | 17        |
| 900  | 3 1   | 3,7       |
| 910  | 3 1   | 3,7       |
| 920  | 3 1   | 3,7       |
| 930  | 3 1   | 3,7       |
| 940  | 3 1   | 7,12      |
| 950  |       | 17        |
| 1000 | 3 1   | 4,7       |
| 1010 | 4 8   | 4,7       |
| 1020 | 4 8   | 4,7       |
| 1030 | 4 8   | 4,7       |

|      |       |           |
|------|-------|-----------|
| 1040 | 4 8   | 4,7       |
| 1050 | 4 8   | 4,7       |
| 1100 | 5 1   | 7         |
| 1110 | 3 1   | 7         |
| 1120 | 3 1   | 3,7       |
| 1130 | 3 1   | 3,7       |
| 1140 | 3 1   | 3,7       |
| 1150 | 3 1   | 3,7       |
| 1210 | 5 1   | 3,7       |
| 1220 | 5 1   | 4         |
| 1230 | 5 1   | 3,5,7     |
| 1240 | 2 1   | 3,7       |
| 1250 | 2 5,6 | 4         |
| 1300 | 2 1   | 1         |
| 1310 | 3 7   | 4,12      |
| 1320 | 4 7   | 12,13     |
| 1330 | 4 7   | 12        |
| 1340 | 2 7   | 12,13     |
| 1350 | 3 1   | 7         |
| 1400 | 5 1   | 3,5,7,11  |
| 1410 | 5 1   | 3,7       |
| 1420 | 5 1   | 3,7,11    |
| 1430 | 3 1   | 3,7,11    |
| 1440 | 3 1   | 3,7,11    |
| 1450 | 3 1   | 3,7,11,15 |
| 1510 | 4 9   | 4,7,11    |
| 1520 | 4 9   | 4,7       |
| 1530 | 3 1   | 3,7,11    |
| 1540 | 2 1   | 1         |
| 1550 | 2 1   | 1         |
| 1600 | 2 1   | 1         |
| 1610 | 2 1   | 1         |
| 1620 | 2 1   | 1         |
| 1630 | 2 1   | 1         |
| 1640 | 5 1   | 3,7       |
| 1650 | 5 1   | 3,7       |
| 1700 | 5 1   | 3,7       |
| 800  | 2 1   | 1         |
| 810  | 2 1   | 1         |
| 820  | 2 5   | 5,6       |
| 830  | 2 3   | 6         |
| 840  | 2 1   | 4,5,6     |
| 850  | 2 1   | 1,6       |
| 900  | 2 1   | 1,6       |
| 910  | 2 1   | 1,6       |
| 920  | 2 1   | 1         |
| 930  | 2 1   | 1         |
| 940  | 2 1   | 1         |
| 950  | 2 1   | 1         |
| 1000 | 2 1   | 1         |

|      |         |         |
|------|---------|---------|
| 1010 | 2 1     | 1       |
| 1030 | 2 1     | 1       |
| 1040 | 2 5,6   | 4,9     |
| 1050 | 2 1     | 1       |
| 1100 | 2 1     | 1       |
| 1110 | 2 1     | 1       |
| 1120 | 2 1     | 1       |
| 1130 | 2 1     | 1       |
| 1140 | 2 1     | 1       |
| 1150 | 2 1     | 1       |
| 1200 | 2 1     | 1       |
| 1210 | 2 1     | 1       |
| 1220 | 2 1     | 1       |
| 1240 | 2 5     | 5,6     |
| 1250 | 2 5     | 5,6     |
| 1300 | 2 5     | 5,6     |
| 1310 | 2 1     | 1       |
| 1320 | 2 1     | 1       |
| 1330 | 2 1     | 1       |
| 1340 | 2 1     | 1       |
| 1350 | 2 1     | 1       |
| 1400 | 2 1     | 1       |
| 1410 | 2 1     | 1       |
| 1420 | 2 1     | 1       |
| 1430 | 2 1     | 1       |
| 1440 | 2 1     | 1       |
| 1450 | 2 1     | 1       |
| 1500 | 2 3     | 5       |
| 1510 | 2 1     | 1       |
| 1520 | 2 1     | 1       |
| 1540 | 2 8     | 12      |
| 1550 | 2 1     | 1       |
| 1600 | 2 1     | 1       |
| 1610 | 2 1     | 1       |
| 1620 | 2 1     | 1       |
| 1630 | 2 1     | 1       |
| 1640 | 2 1     | 1       |
| 1650 | 2 1     | 1       |
| 1700 | 2 1     | 1       |
| 800  | 2 1     | 1       |
| 810  | 2 1     | 1       |
| 820  | 2 1     | 1       |
| 830  | 2 1     | 1       |
| 840  | 2 1     | 1       |
| 850  | 2 5     | 4,15,16 |
| 900  | 2 5,6   | 1       |
| 910  | 2 3,4,5 | 1       |
| 920  | 2 3,4   | 1       |
| 930  | 2 5     | 1       |
| 940  | 2 5     | 4,5,6   |



|      |          |           |
|------|----------|-----------|
| 950  | 2 1      | 1         |
| 1000 | 2 1      | 1         |
| 1010 | 2 1      | 1         |
| 1030 | 2 1      | 1         |
| 1040 | 2 2,3,4  | 1,4       |
| 1050 | 2 1      | 1         |
| 1100 | 2 1      | 1         |
| 1110 | 2 1      | 1         |
| 1120 | 2 1      | 1         |
| 1130 | 2 1      | 1         |
| 1140 | 2 1      | 1         |
| 1150 | 2 1      | 1         |
| 1200 | 2 5,6    | 1,4       |
| 1210 | 2 5,6    | 7         |
| 1220 | 2 1      | 7         |
| 1240 | 2 5      | 5,7       |
| 1250 | 2 5      | 5,7       |
| 1300 | 2 10     | 4,7       |
| 1310 | 2 3,10   | 4,7       |
| 1320 | 2 10     | 4,7       |
| 1330 | 2 10     | 4,7       |
| 1340 | 2 10     | 4,7       |
| 1350 | 2 10     | 4,7       |
| 1400 | 2 10     | 4,7       |
| 1410 | 2 10     | 4,7       |
| 1420 | 2 5,6,10 | 4         |
| 1430 | 2 10     | 1,4       |
| 1440 | 2 10     | 1         |
| 1450 | 2 10     | 1         |
| 1500 | 2 10     | 1         |
| 1510 | 2 10     | 4         |
| 1520 | 2 10     | 4         |
| 1540 | 2 10     | 1         |
| 1550 | 2 10     | 1         |
| 1600 | 2 10     | 4         |
| 1610 | 2 10     | 1         |
| 1620 | 2 10     | 1         |
| 1630 | 2 10     | 1         |
| 1640 | 2 10     | 1         |
| 1650 | 2 10     | 1         |
| 1700 | 2 10     | 1,4       |
| 800  | 5 1      | 4,7       |
| 810  | 5 1      | 5,7       |
| 820  | 5 1      | 5,7,15    |
| 830  | 5 1      | 5,7       |
| 840  | 5 5      | 4,5,7     |
| 850  | 5 14     | 4,7       |
| 900  | 5 1      | 7         |
| 910  | 2 1      | 4,7,15,16 |
| 920  | 2 1      | 7,15      |

|      |      |           |
|------|------|-----------|
| 930  | 2 1  | 7,15,16   |
| 940  | 2 1  | 4,7,15,16 |
| 950  | 2 1  | 7,15      |
| 1000 | 2 1  | 4,7       |
| 1010 | 2 1  | 4,7       |
| 1030 | 1 5  | 4,7       |
| 1040 | 1 5  | 7         |
| 1050 | 2 1  | 1         |
| 1100 | 2 1  | 1         |
| 1110 | 2 1  | 1         |
| 1120 | 2 1  | 1         |
| 1130 | 2 1  | 1         |
| 1140 | 2 1  | 1         |
| 1150 | 5 5  | 4,7       |
| 1200 | 5 14 | 7         |
| 1210 | 5 14 | 7         |
| 1220 | 5 14 | 7         |
| 1240 | 5 14 | 5,7,15,16 |
| 1250 | 5 14 | 5,7,15,16 |
| 1300 | 4 7  | 4,12      |
| 1310 | 4 7  | 4,7,15,16 |
| 1320 | 3 7  | 4,12,13   |
| 1330 | 4 7  | 15,16     |
| 1340 | 3 7  | 7         |
| 1350 | 5 12 | 4,7       |
| 1400 | 5 12 | 4,7       |
| 1410 | 2 5  | 4,10,11   |
| 1420 | 2 1  | 4         |
| 1430 | 2 1  | 1         |
| 1440 | 2 1  | 4         |
| 1450 | 1 5  | 12        |
| 1500 | 5 14 | 7         |
| 1510 | 5 14 | 7         |
| 1520 | 5 14 | 7         |
| 1540 | 2 1  | 7,15,16   |
| 1550 | 2 1  | 7         |
| 1600 | 2 1  | 4,15,16   |
| 1610 | 3 1  | 7,15,16   |
| 1620 | 3 1  | 7,15,16   |
| 1630 | 3 1  | 7,15,16   |
| 1640 | 5 1  | 7         |
| 1650 | 3 1  | 7         |
| 1700 | 2 1  | 4,7       |
| 800  | 2 1  | 1         |
| 810  | 2 1  | 1         |
| 820  | 2 1  | 1         |
| 830  | 2 5  | 1         |
| 840  | 1 5  | 7,15,16   |
| 850  | 5 1  | 5,7,15    |
| 900  | 5 1  | 7         |

|      |        |                  |
|------|--------|------------------|
| 910  | 5 1    | 7                |
| 920  | 5 1    | 7                |
| 930  | 2 1    | 4,7,15           |
| 940  | 2 1    | 4,7              |
| 950  | 2 7    | 4,7              |
| 1000 | 4 7    | 4,7              |
| 1010 | 4 7    | 4,12             |
| 1030 | 2 1    | 4,7,15           |
| 1040 | 2 1    | 4,7,15           |
| 1050 | 2 1    | 4,7              |
| 1100 | 2 1    | 7,11             |
| 1110 | 2 1    | 4,7,15           |
| 1120 | 2 1    | 4,7              |
| 1130 | 2 1    | 7                |
| 1140 | 2 1    | 7                |
| 1150 | 2 1    | 7                |
| 1200 | 2 1    | 7                |
| 1210 | 5 14   | 7                |
| 1220 | 5 14   | 7                |
| 1240 | 5 1    | 5,7,15,16        |
| 1250 | 5 1    | 5,7,15,16        |
| 1300 | 2 5    | 4                |
| 1310 | 1 5    | 7                |
| 1320 | 1 1    | 7                |
| 1330 | 1 1    | 7                |
| 1340 | 3 12   | 4,7              |
| 1350 | 3 2    | 4,7              |
| 1400 |        | 17               |
| 1410 |        | 17               |
| 1420 |        | 17               |
| 1430 |        | 17               |
| 1440 |        | 17               |
| 1450 |        | 17               |
| 1500 |        | 17               |
| 1510 |        | 17               |
| 1520 |        | 17               |
| 1540 |        | 17               |
| 1550 |        | 17               |
| 1600 |        | 17               |
| 1610 |        | 17               |
| 1620 |        | 17               |
| 1630 |        | 17               |
| 1640 |        | 17               |
| 1650 |        | 17               |
| 1700 |        | 17               |
| 800  | 2 5,10 | 4,10             |
| 810  | 2 10   | 4,10             |
| 820  | 2 5,10 | 4,5,10           |
| 830  | 2 10   | 4,5,10,15,<br>16 |

|      |          |            |
|------|----------|------------|
| 840  | 2 10     | 4,5,10     |
| 850  | 2 3,10   | 4,10,15    |
| 900  | 1 10     | 4,13       |
| 910  | 2 5,10   | 1          |
| 920  | 2 1      | 1          |
| 930  | 2 1      | 1          |
| 940  | 2 10     | 1          |
| 950  | 2 1      | 1          |
| 1000 | 2 10     | 1          |
| 1010 | 2 3,5,10 | 10         |
| 1030 | 1 3,10   | 10,15,16   |
| 1040 | 2 5,10   | 4,7        |
| 1050 | 5 10     | 4,7        |
| 1100 | 5 10     | 4,7        |
| 1110 | 1 10     | 4,10       |
| 1120 | 2 1      | 1          |
| 1130 | 2 1      | 1          |
| 1140 | 2 1      | 1          |
| 1150 | 2 1      | 1          |
| 1200 | 2 1      | 1          |
| 1210 | 2 1      | 1          |
| 1220 | 2 1      | 1          |
| 1240 | 2 10     | 5,7,15,16  |
| 1250 | 2 10     | 5,7,15,16  |
| 1300 | 2 10     | 5,7        |
| 1310 | 2 10     | 4,7        |
| 1320 | 2 10     | 4,7        |
| 1330 | 2 10     | 4,7        |
| 1340 | 2 10     | 4,7        |
| 1350 | 2 10     | 4,7        |
| 1400 | 2 10     | 4,7        |
| 1410 | 3 7      | 4,7,11     |
| 1420 | 3 7      | 4,13       |
| 1430 | 4 7,10   | 4,10,15,16 |
| 1440 | 4 7      | 6          |
| 1450 | 4 7,10   | 12         |
| 1500 | 5 10,14  | 4,10,11    |
| 1510 | 5 10,14  | 7          |
| 1520 | 2 1      | 7          |
| 1540 | 2 3,10   | 1          |
| 1550 | 2 10     | 4          |
| 1600 | 2 5,10   | 1          |
| 1610 | 2 10     | 1          |
| 1620 | 2 10     | 1          |
| 1630 | 2 10     | 1          |
| 1640 | 2 10     | 1          |
| 1650 | 2 10     | 1          |
| 1700 | 2 10     | 4          |
| 800  | 2 1      | 1          |

|      |           |           |
|------|-----------|-----------|
| 810  | 2 1       | 5,10      |
|      |           | 5,10,15,1 |
| 820  | 2 1       | 6         |
| 830  | 2 1       | 10        |
| 840  | 2 1       | 4,10,15   |
| 850  | 2 14      | 4,10      |
| 900  | 2 7       | 4,10      |
| 910  | 2 7       | 4,15,16   |
| 920  | 2 7       | 4,12      |
| 930  | 2 7       | 4,10      |
| 940  | 2 14      | 4,10      |
| 950  | 2 8       | 4,10      |
| 1000 | 2 8       | 4,10      |
| 1010 | 2 2,3,4,8 | 4,10      |
| 1030 | 2 8       | 4,10      |
| 1040 | 2 8       | 4,10      |
| 1050 | 3 1       | 13        |
| 1100 | 3 5       | 10,13     |
| 1110 | 2 5,14    | 4,10      |
| 1120 | 2 1       | 10        |
| 1130 | 2 1       | 4         |
| 1140 | 2 14      | 4         |
| 1150 | 2 14      | 4         |
| 1200 | 2 14      | 4,13      |
| 1210 | 5 14      | 4,5,10    |
| 1220 | 5 14      | 4,5,10    |
| 1230 | 5 14      | 4,5,10    |
| 1250 | 2 10      | 4,10      |
| 1300 | 2 10      | 4,10      |
| 1310 | 2 10      | 4,10      |
| 1320 | 2 10      | 4,10      |
| 1330 | 2 10      | 4,10      |
| 1340 | 2 10      | 4         |
| 1350 | 2 10      | 4,10      |
| 1400 | 2 10      | 4,10      |
| 1410 | 2 2,10    | 4,10      |
| 1420 | 2 1       | 1         |
| 1430 | 2 1       | 1         |
| 1440 | 2 14      | 4,10      |
| 1450 | 2 1       | 1         |
| 1500 | 2 1       | 1         |
| 1520 | 2 1       | 1         |
| 1530 | 2 1       | 1         |
| 1540 | 2 1       | 1         |
| 1550 | 2 1       | 1         |
| 1600 | 2 3       | 4,15      |
| 1610 | 2 1       | 4,15,16   |
| 1620 | 2 1       | 4         |
| 1630 | 2 1       | 1         |
| 1640 | 2 1       | 1         |

|      |       |           |
|------|-------|-----------|
| 1650 | 2 1   | 1         |
| 1700 | 2 3,5 | 6         |
| 800  | 2 1   | 1         |
| 810  | 2 1   | 5,10      |
| 820  | 2 1   | 13        |
| 830  | 2 1   | 4         |
| 840  | 2 14  | 4         |
| 850  | 2 1   | 1         |
| 900  | 2 1   | 1         |
| 910  | 2 8   | 4,10      |
|      |       | 4,10,15,1 |
| 920  | 2 8   | 6         |
| 930  | 2 8   | 4,10      |
| 940  | 2 8   | 4         |
| 950  | 2 1   | 1         |
| 1000 | 2 1   | 1         |
| 1010 | 2 1   | 1         |
| 1030 | 2 7   | 4         |
| 1040 | 2 7   | 4         |
| 1050 | 2 7   | 4         |
| 1100 | 2 7   | 4,12      |
| 1110 | 2 1   | 1         |
| 1120 | 2 1   | 1         |
| 1130 | 2 1   | 1         |
| 1140 | 2 1   | 1         |
| 1150 | 2 1   | 1         |
| 1200 | 2 1   | 1         |
| 1210 | 2 14  | 4,5,10    |
| 1220 | 2 1   | 5,10      |
| 1230 | 2 1   | 5,10      |
| 1250 | 2 1   | 1         |
| 1300 | 2 1   | 1         |
| 1310 | 2 1   | 4         |
| 1320 | 2 2   | 4,15,16   |
| 1330 | 2 1   | 1         |
| 1340 | 2 1   | 1         |
| 1350 | 2 10  | 4         |
| 1400 | 2 10  | 4         |
| 1410 | 2 1   | 1         |
| 1420 | 2 1   | 1         |
| 1430 | 2 1   | 1         |
| 1440 | 2 1   | 1         |
| 1450 | 2 1   | 1         |
| 1500 | 2 1   | 1         |
| 1520 | 2 1   | 1         |
| 1530 | 2 1   | 1         |
| 1540 | 3 1   | 4,15,16   |
| 1550 | 3 1   | 1         |
| 1600 | 7     | 17        |
| 1610 | 7     | 17        |

|      |         |                |
|------|---------|----------------|
| 1620 | 7       | 17             |
| 1630 | 7       | 17             |
| 1640 | 7       | 17             |
| 1650 | 7       | 17             |
| 1700 | 7       | 17             |
| 800  | 2 1     | 10             |
| 810  | 2 1     | 5,10           |
| 820  | 2 3,4   | 4,10,15,1<br>6 |
| 830  | 2 1     | 10             |
| 840  | 2 1     | 10             |
| 850  | 2 1     | 10             |
| 900  | 2 1     | 10             |
| 910  | 2 1     | 10             |
| 920  | 1 1     | 12             |
| 930  | 1 1     | 10             |
| 940  | 1 1     | 13             |
| 950  | 2 1     | 10,15,16       |
| 1000 | 2 1     | 10             |
| 1010 | 2 2,3,4 | 4,10           |
| 1030 | 2 14    | 4,13           |
| 1040 | 2 14    | 4,13           |
| 1050 | 2 1     | 10             |
| 1100 | 2 1     | 10             |
| 1110 | 2 1     | 10             |
| 1120 | 3 1     | 13             |
| 1130 | 5 1     | 4,10           |
| 1140 | 5 1     | 4,10           |
| 1150 | 5 1     | 10             |
| 1200 | 5 1     | 10             |
| 1210 | 5 1     | 4,5,10         |
| 1220 | 5 1     | 5,10           |
| 1230 | 5 1     | 5,10           |
| 1250 | 2 1     | 10             |
| 1300 | 2 1     | 10             |
| 1310 | 2 1     | 10             |
| 1320 | 2 1     | 10             |
| 1330 | 2 1     | 10             |
| 1340 | 2 1     | 10             |
| 1350 | 2 1     | 10             |
| 1400 | 2 1     | 10             |
| 1410 | 1 1     | 13             |
| 1420 | 2 1     | 1              |
| 1430 | 2 1     | 1              |
| 1440 | 2 1     | 1              |
| 1450 | 2 1     | 1              |
| 1500 | 2 1     | 1              |
| 1520 | 2 1     | 1              |
| 1530 | 2 1     | 1              |
| 1540 | 2 14    | 4              |

|      |      |      |
|------|------|------|
| 1550 | 2 14 | 4    |
| 1600 | 2 5  | 4,15 |
| 1610 | 2 1  | 1    |
| 1620 | 2 1  | 1    |
| 1630 | 2 1  | 1    |
| 1640 | 2 1  | 1    |
| 1650 | 2 1  | 1    |
| 1700 | 2 1  | 1    |
