# Supplementary material for: A comparative study of patients’ activities and interactions in a stroke unit before and after reconstruction—The significance of the built environment
Source: PubMed Central journal article supplement (PMC5519004; doi:10.1371/journal.pone.0177477), 2017-07-20
Supplement: pone.0177477.s002.pdf [file pone.0177477.s002.pdf]

| TIME | Location  | People | Activity |
|------|-----------|--------|----------|
| 800  | 2 1       | 1      |          |
| 810  | 2 1       | 1      |          |
| 820  | 2 5       | 1      |          |
| 830  | 2 5       | 4      |          |
| 840  | 1 5       | 4,7,15 |          |
| 850  | 3 5       | 4,7    |          |
| 900  | 5 5       | 5,7,15 |          |
| 910  | 5 1       | 7      |          |
| 920  | 5 14      | 7      |          |
| 930  | 2 5,6     | 4,11   |          |
| 940  | 2 1       | 1      |          |
| 950  | 2 1       | 1      |          |
| 1000 | 2 1       | 1      |          |
| 1010 | 2 1       | 1      |          |
| 1020 | 2 1       | 1      |          |
| 1030 | 2 1       | 1      |          |
| 1040 | 2 1       | 1      |          |
| 1050 | 2 1       | 1      |          |
| 1100 | 2 1       | 1      |          |
| 1110 | 2 1       | 1      |          |
| 1120 | 2 1       | 1      |          |
| 1130 | 2 1       | 1      |          |
| 1140 | 2 1       | 1      |          |
| 1200 | 2 7       | 4      |          |
| 1210 | 2 5,7     | 4,7,9  |          |
| 1220 | 5 5,14    | 5,7,15 |          |
| 1230 | 5 5,14    | 4,7    |          |
| 1240 | 5 5,14    | 4,7    |          |
| 1250 | 2 1       | 4,15   |          |
| 1300 | 2 1       | 1      |          |
| 1310 | 2 1       | 1      |          |
| 1320 | 2 1       | 1      |          |
| 1330 | 2 7,13    | 4,7,9  |          |
| 1340 | 4 7,12,13 | 4,7    |          |
| 1350 | 4 5,7,8   | 4,7,17 |          |
| 1400 | 3 5,7     | 4,7    |          |
| 1410 | 2 1       | 1      |          |
| 1420 | 2 1       | 1      |          |
| 1430 | 2 1       | 1      |          |
| 1440 | 2 1       | 1      |          |
| 1450 | 2 1       | 1      |          |
| 1500 | 2 1       | 1      |          |
| 1510 | 2 1       | 1      |          |
| 1530 | 2 1       | 1      |          |
| 1540 | 2 1       | 1      |          |
| 1550 | 2 1       | 1      |          |
| 1600 | 2 1       | 1      |          |
| 1610 | 2 1       | 1      |          |
| 1620 | 2 1       | 1      |          |

|      |        |           |
|------|--------|-----------|
| 1630 | 2 1    | 1         |
| 1640 | 2 10   | 4         |
| 1650 | 2 10   | 4         |
| 1700 | 2 10   | 4         |
| 800  | 2 1    | 1         |
| 810  | 2 1    | 1         |
| 820  | 2 1    | 1         |
| 830  | 2 1    | 1         |
| 840  | 2 1    | 1         |
| 850  | 2 5    | 1         |
| 900  | 2 5    | 1         |
| 910  | 3 1    | 7         |
| 920  | 5 5    | 4,5,7,15  |
| 930  | 5 5    | 5,7       |
| 940  | 4 8    | 4,7,15,16 |
| 950  | 4 8    | 4,7,15,16 |
| 1000 | 4 8    | 4,12      |
| 1010 | 4 8    | 4,7       |
| 1020 | 3 8    | 7         |
| 1030 | 2 1    | 1         |
| 1040 | 2 1    | 1         |
| 1050 | 2 1    | 1         |
| 1100 | 2 1    | 1         |
| 1110 | 2 1    | 1         |
| 1120 | 2 1    | 1         |
| 1130 | 2 5,6  | 7,9       |
| 1140 | 2 5,6  | 7,9       |
| 1200 | 5 5,14 | 5,7       |
| 1210 | 5 14   | 5,7,15    |
| 1220 | 5 14   | 7         |
| 1230 | 5 5,14 | 4,7       |
| 1240 | 5 5,14 | 4,7       |
| 1250 | 5 14   | 7         |
| 1300 | 5 14   | 7         |
| 1310 | 2 1    | 1         |
| 1320 | 2 1    | 1         |
| 1330 | 2 1    | 1         |
| 1340 | 2 1    | 1         |
| 1350 | 2 1    | 1         |
| 1400 | 2 1    | 1         |
| 1410 | 2 3,5  | 7,9       |
| 1420 | 4 1    | 1         |
| 1430 | 4 9    | 7         |
| 1440 | 3 9    | 4,7       |
| 1450 | 3 9    | 4,5,7     |
| 1500 | 3 5,9  | 4,5,7     |
| 1510 | 3 5,9  | 4,7       |
| 1530 | 3 1    | 7         |
| 1540 | 3 1    | 7         |
| 1550 | 1 5,6  | 7,12      |

|      |   |      |            |
|------|---|------|------------|
| 1600 | 1 | 5,6  | 7          |
| 1610 | 2 | 1    | 1          |
| 1620 | 2 | 1    | 1          |
| 1630 | 2 | 1    | 1          |
| 1640 | 2 | 1    | 1          |
| 1650 | 2 | 1    | 1          |
| 1700 | 2 | 1    | 1          |
| 800  | 2 | 1    | 5,10       |
| 810  | 2 | 5    | 4,5,10     |
|      |   |      | 5,10,15,1  |
| 820  | 2 | 1    | 6          |
| 830  | 2 | 1    | 5,10       |
| 840  | 3 | 14   | 4,12,13    |
|      |   |      | 4,10,15,1  |
| 850  | 3 | 1    | 6          |
| 900  | 3 | 1    | 13         |
| 910  | 3 | 1    | 10         |
| 920  | 3 | 1    | 4,10       |
| 930  | 3 | 1    | 10         |
| 940  | 2 | 1    | 1          |
| 950  | 2 | 1    | 1          |
| 1000 | 2 | 1    | 1          |
| 1010 | 2 | 1    | 1          |
| 1020 | 2 | 1    | 1          |
|      |   |      | 4,10,15,1  |
| 1030 | 2 | 1    | 6          |
|      |   |      | 4,10,15,1  |
| 1040 | 2 | 1    | 6          |
| 1050 | 3 | 14   | 4,10       |
|      |   |      | 4,10,15,1  |
| 1100 | 3 | 14   | 6          |
|      |   |      | 4,10,15,1  |
| 1110 | 3 | 14   | 6          |
| 1120 | 3 | 14   | 4,10       |
| 1130 | 3 | 14   | 4,10       |
| 1140 | 3 | 14   | 4,10       |
|      |   |      | 4,5,10,15, |
| 1200 | 5 | 14   | 16         |
|      |   |      | 4,5,10,15, |
| 1210 | 5 | 14   | 16         |
| 1220 | 5 | 14   | 4,10       |
| 1230 | 5 | 5,14 | 4,10       |
| 1240 | 5 | 5,14 | 4,10       |
| 1250 | 5 | 14   | 4,10       |
| 1300 | 5 | 14   | 4,10       |
| 1310 | 3 | 1    | 13         |
| 1320 | 3 | 3,14 | 4,12       |
| 1330 | 3 | 12   | 4,12,13    |
| 1340 | 3 | 14   | 4,10       |

|      |      |                |
|------|------|----------------|
| 1350 | 3 14 | 4,10,15,1<br>6 |
| 1400 | 3 14 | 4,10,15,1<br>6 |
| 1410 | 3 14 | 4,10,15,1<br>6 |
| 1420 | 3 14 | 4,10,15,1<br>6 |
| 1430 | 3 14 | 4,10           |
| 1440 | 3 14 | 4,10,15,1<br>6 |
| 1450 | 3 14 | 4,5,10         |
| 1500 | 3 14 | 4,10,15,1<br>6 |
| 1510 | 3 14 | 4,10           |
| 1530 | 3 14 | 4,10           |
| 1540 | 2 1  | 4,10           |
| 1550 | 3 14 | 4,10           |
| 1600 | 3 14 | 4,10           |
| 1610 | 3 14 | 4,10           |
| 1620 | 3 14 | 4,10           |
| 1630 | 3 14 | 4,13           |
| 1640 | 2 1  | 4              |
| 1650 | 2 1  | 4,15,16        |
| 1700 | 2 1  | 1              |
| 800  | 2 1  | 5,10           |
| 810  | 2 1  | 4,10           |
| 820  | 2 1  | 5,10,15        |
| 830  | 2 1  | 4,10           |
| 840  | 2 1  | 4,10           |
| 850  | 2 1  | 4,10,15        |
| 900  | 2 1  | 4,10           |
| 910  | 2 1  | 4,10           |
| 920  | 2 1  | 1              |
| 930  | 2 1  | 4,10           |
| 940  | 2 1  | 4,10           |
| 950  | 2 1  | 4,10           |
| 1000 | 2 1  | 4,10,15,1<br>6 |
| 1010 | 2 1  | 4,10           |
| 1020 | 2 1  | 4,12           |
| 1030 | 2 3  | 4,10           |
| 1040 | 2 1  | 4,5,15,16      |
| 1050 | 2 8  | 4              |
| 1100 | 3 7  | 4,13,15,1<br>6 |
| 1110 | 2 1  | 4,10,15,1<br>6 |
| 1120 | 3 7  | 4,13           |
| 1130 | 2 1  | 4,10           |

|      |          |           |
|------|----------|-----------|
| 1140 | 2 1      | 4,10      |
| 1200 | 2 1      | 4,5,10    |
| 1210 | 2 1      | 10        |
| 1220 | 2 1      | 4,13      |
| 1230 | 2 1      | 4,15,16   |
| 1240 | 2 1      | 4,15,16   |
| 1250 | 2 1      | 4,15      |
| 1300 | 2 5      | 4         |
| 1310 | 2 1      | 4,10      |
| 1320 | 2 1      | 4,10      |
|      |          | 4,10,15,1 |
| 1330 | 2 10     | 6         |
| 1340 | 10       | 17        |
| 1350 | 10 2,10  | 4,10      |
| 1400 | 2 5,6,10 | 4,13      |
| 1410 |          | 17        |
| 1420 |          | 17        |
| 1430 |          | 17        |
| 1440 |          | 17        |
| 1450 |          | 17        |
| 1500 |          | 17        |
| 1510 |          | 17        |
| 1530 |          | 17        |
| 1540 |          | 17        |
| 1550 |          | 17        |
| 1600 |          | 17        |
| 1610 |          | 17        |
| 1620 |          | 17        |
| 1630 |          | 17        |
| 1640 |          | 17        |
| 1650 |          | 17        |
| 1700 |          | 17        |
| 800  | 2 1      | 5,7       |
| 810  | 2 1      | 4,7       |
| 820  | 2 1      | 5,7,15    |
| 830  | 2 1      | 4,7       |
| 840  | 2 1      | 4,7       |
| 850  | 2 1      | 7,15,16   |
| 900  | 1 1      | 7,11      |
| 910  | 2 1      | 4,7       |
| 920  | 1 1      | 7,11      |
| 930  | 2 1      | 4,7       |
| 940  | 2 1      | 4,7       |
| 950  | 2 1      | 4,7       |
| 1000 | 2 1      | 4,7       |
| 1010 | 2 1      | 4,7       |
| 1020 | 2 1      | 4,6       |
| 1030 | 8        | 17        |
| 1040 | 8 1      | 17        |
| 1050 | 8        | 17        |

|      |         |           |
|------|---------|-----------|
| 1100 | 8       | 17        |
| 1110 | 8       | 17        |
| 1120 | 8       | 17        |
| 1130 | 8       | 17        |
| 1140 | 2 1     | 4         |
| 1200 | 2 1     | 4,5,10    |
| 1210 | 1 1     | 7,12      |
| 1220 | 2 1     | 4,10      |
| 1230 | 2 10    | 4,10      |
| 1240 | 2 10    | 4,10      |
| 1250 | 2 10    | 4,10      |
| 1300 | 2 10    | 4,10      |
| 1310 | 2 10    | 4,10      |
| 1320 | 2 10    | 4,10      |
| 1330 | 2 10    | 4,10      |
| 1340 | 2 10    | 4,10      |
| 1350 | 2 10    | 4,10      |
| 1400 | 2 10    | 4,10      |
|      |         | 4,10,15,1 |
| 1410 | 2 10,13 | 6         |
| 1420 | 2 10    | 4,10      |
| 1430 | 2 10    | 4,7       |
| 1440 | 2 10    | 4,7       |
| 1450 | 2 10    | 4,7       |
| 1500 | 2 10    | 4,7       |
| 1510 | 2 10    | 4,7       |
| 1530 | 2 1     | 7         |
| 1540 | 2 1     | 4,7       |
| 1550 | 2 1     | 4         |
| 1600 | 2 1     | 4         |
| 1610 | 2 1     | 4         |
| 1620 | 2 1     | 4         |
| 1630 | 2 1     | 1         |
| 1640 | 2 1     | 1         |
| 1650 | 2 1     | 1         |
| 1700 | 2 5     | 4,7,9     |
| 800  | 2 1     | 1         |
| 810  | 2 1     | 1         |
| 820  | 2 1     | 1         |
| 830  | 2 3     | 4,5,6     |
| 840  | 2 1     | 6,15,16   |
| 850  |         | 17        |
| 900  | 2 1     | 1         |
| 910  | 2 1     | 1         |
| 920  | 1 1     | 10        |
| 930  | 2 1     | 10,15,16  |
| 940  | 2 1     | 6         |
| 950  | 2 1     | 6         |
| 1000 | 2 1     | 4,6,15,16 |
| 1010 | 2 1     | 6         |

|      |       |           |
|------|-------|-----------|
| 1020 | 2 1   | 6         |
| 1030 | 2 1   | 6         |
| 1040 | 2 1   | 1         |
| 1050 | 2 1   | 1         |
| 1100 | 2 1   | 1         |
| 1110 | 2 5,6 | 1,4       |
| 1120 | 2 1   | 15,16     |
| 1130 | 2 1   | 1         |
| 1140 | 2 1   | 1         |
| 1200 | 2 1   | 5,6       |
| 1210 | 2 1   | 5,15,16   |
| 1220 | 2 1   | 6         |
| 1230 | 2 1   | 4,6       |
| 1240 | 2 1   | 6         |
| 1250 | 2 1   | 6,15      |
| 1300 | 2 1   | 6         |
| 1310 | 2 1   | 6,15,16   |
| 1320 | 2 1   | 6,15,16   |
| 1330 | 2 1   | 6         |
| 1340 | 3 1   | 13,15,16  |
| 1350 | 3 1   | 13,15,16  |
| 1400 | 3 1   | 13        |
| 1410 | 2 1   | 10,15,16  |
| 1420 | 2 1   | 4,6,15,16 |
| 1430 | 2 1   | 4,6       |
| 1440 | 2 1   | 4,7       |
| 1450 | 2 14  | 4,6       |
| 1500 | 2 1   | 4,6       |
| 1510 | 2 1   | 4,6       |
| 1530 | 2 1   | 4,6       |
| 1540 | 2 1   | 4,6       |
| 1550 | 2 1   | 4,6       |
| 1600 | 2 1   | 4         |
| 1610 | 2 1   | 4,6       |
| 1620 | 2 1   | 4,6       |
| 1630 | 2 1   | 1         |
| 1640 | 2 1   | 1         |
| 1650 | 2 1   | 4,10      |
| 1700 | 2 5   | 4,5,10    |
| 800  | 1 5   | 7,15,16   |
| 810  | 3 1   | 7         |
| 820  | 3 5   | 5,7       |
| 830  | 3 5   | 5,7,15    |
| 840  | 3 1   | 7         |
| 850  | 3 1   | 7         |
| 900  | 3 1   | 5,7,15    |
| 910  | 3 1   | 7         |
| 920  | 3 1   | 7         |
| 930  | 3 1   | 7         |
| 940  | 3 1   | 7         |

|      |         |       |
|------|---------|-------|
| 950  | 2 1     | 7     |
| 1000 | 2 1     | 1     |
| 1010 | 2 1     | 1     |
| 1030 | 2 1     | 1     |
| 1040 | 2 1     | 1     |
| 1050 | 2 3     | 4     |
| 1100 | 2 1     | 1     |
| 1110 | 2 1     | 1     |
| 1120 | 2 1     | 1     |
| 1130 | 2 1     | 1     |
| 1140 | 2 1     | 1     |
| 1150 | 2 1     | 1     |
| 1200 | 2 1     | 1     |
| 1210 | 2 1     | 1     |
| 1220 | 2 5     | 4,5,6 |
| 1230 | 2 3,5   | 1     |
| 1240 | 2 1     | 1     |
| 1250 | 2 1     | 1     |
| 1300 | 2 1     | 1     |
| 1320 | 2 1     | 1     |
| 1330 | 2 1     | 1     |
| 1340 | 2 1     | 1     |
| 1350 | 2 1     | 1     |
| 1400 | 2 5     | 1     |
| 1410 | 2 1     | 7     |
| 1420 | 2 1     | 7     |
| 1430 | 2 9     | 4,5,7 |
| 1440 | 2 3,5,9 | 6     |
| 1450 | 9       | 17    |
| 1500 | 9       | 17    |
| 1510 | 9       | 17    |
| 1520 | 9       | 17    |
| 1530 | 9       | 17    |
| 1540 | 9       | 17    |
| 1550 | 9       | 17    |
| 1600 | 9       | 17    |
| 1620 | 2 5,6   | 1     |
| 1630 | 2 1     | 1     |
| 1640 | 2 1     | 1     |
| 1650 | 2 1     | 1     |
| 1700 | 2 1     | 1     |
| 800  | 2 1     | 1     |
| 810  | 2 1     | 1     |
| 820  | 2 1     | 1     |
| 830  | 2 1     | 1     |
| 840  | 2 1     | 1     |
| 850  | 2 5,6   | 1     |
| 900  | 2 5     | 1     |
| 910  | 2 1     | 1     |
| 920  | 2 1     | 1     |



|      |       |        |
|------|-------|--------|
| 930  | 2 1   | 1      |
| 940  | 2 1   | 1      |
| 950  | 2 8,9 | 4      |
| 1000 | 2 5   | 4,5,10 |
| 1010 | 2 1   | 12     |
| 1030 | 10    | 17     |
| 1040 | 10    | 17     |
| 1050 | 5 1   | 10     |
| 1100 | 5 1   | 10     |
| 1110 | 5 1   | 10     |
| 1120 | 5 1   | 10     |
| 1130 | 5 1   | 10     |
| 1140 | 5 1   | 10     |
| 1150 | 2 1   | 1      |
| 1200 | 2 1   | 1      |
| 1210 | 2 1   | 5,10   |
| 1220 | 2 1   | 5,10   |
| 1230 | 2 1   | 5,10   |
| 1240 | 2 1   | 1      |
| 1250 | 2 1   | 1      |
| 1300 | 2 1   | 1      |
| 1320 | 2 1   | 1      |
| 1330 | 2 1   | 1      |
| 1340 | 2 1   | 1      |
| 1350 | 2 1   | 1      |
| 1400 | 2 1   | 1      |
| 1410 | 2 1   | 1      |
| 1420 | 2 1   | 1      |
| 1430 | 2 1   | 1      |
| 1440 | 2 1   | 10     |
| 1450 | 3 1   | 13     |
| 1500 | 2 1   | 1      |
| 1510 | 2 1   | 1      |
| 1520 | 2 10  | 12,13  |
| 1530 | 2 10  | 13     |
| 1540 | 9     | 17     |
| 1550 | 9     | 17     |
| 1600 | 9     | 17     |
| 1620 | 9     | 17     |
| 1630 | 9     | 17     |
| 1640 | 9     | 17     |
| 1650 | 9     | 17     |
| 1700 | 9     | 17     |
| 800  | 2 5   | 6      |
| 810  | 2 1   | 5,6,15 |
| 820  | 2 1   | 6      |
| 830  | 2 1   | 5,6,15 |
| 840  | 1 5,6 | 7,15   |
| 850  | 1 3   | 7,15   |
| 900  | 2 1   | 1      |

|      |       |         |
|------|-------|---------|
| 910  | 2 1   | 1       |
| 920  | 2 1   | 1       |
| 930  | 2 1   | 1       |
| 940  | 2 1   | 1       |
| 950  | 2 2,3 | 4       |
| 1000 | 2 7   | 4       |
| 1010 | 2 7   | 4,15,16 |
| 1030 | 8     | 17      |
| 1040 | 8     | 17      |
| 1050 | 8     | 17      |
| 1100 | 8     | 17      |
| 1110 | 8     | 17      |
| 1120 | 8     | 17      |
| 1130 | 2 3,5 | 4       |
| 1140 | 2 5   | 4,9     |
| 1150 | 2 1   | 1       |
| 1200 | 2 2   | 4,15,16 |
| 1210 | 2 2   | 4,9     |
| 1220 | 2 3   | 4,5,6   |
| 1230 | 2 1   | 5,6     |
| 1240 | 2 1   | 6       |
| 1250 | 2 1   | 1       |
| 1300 | 2 1   | 1       |
| 1320 | 2 1   | 1       |
| 1330 | 2 1   | 1       |
| 1340 | 9     | 17      |
| 1350 | 9     | 17      |
| 1400 | 9     | 17      |
| 1410 | 9     | 17      |
| 1420 | 9     | 17      |
| 1430 | 2 8   | 9,11,15 |
| 1440 | 2 8   | 4,15    |
| 1450 | 2 1   | 1       |
| 1500 | 2 1   | 1       |
| 1510 | 2 10  | 4       |
| 1520 | 2 10  | 4       |
| 1530 | 2 10  | 4       |
| 1540 | 2 10  | 4       |
| 1550 | 2 10  | 4       |
| 1600 | 2 10  | 4       |
| 1620 | 2 10  | 4       |
| 1630 | 2 10  | 4       |
| 1640 | 2 10  | 4       |
| 1650 | 2 10  | 4       |
| 1700 | 2 10  | 4       |
| 800  | 2 1   | 6       |
| 810  | 2 1   | 6       |
| 820  | 2 1   | 6       |
| 830  | 2 1   | 6       |
| 840  | 2 3,5 | 4,15    |

|      |       |      |
|------|-------|------|
| 850  | 2 3,5 | 4,6  |
| 900  | 3 1   | 7    |
| 910  | 3 3   | 4,7  |
| 920  | 2 7   | 4,15 |
| 930  | 2 7   | 4,9  |
| 940  | 2 7   | 4    |
| 950  | 2 1   | 1    |
| 1000 | 2 8   | 4    |
| 1010 | 2 8   | 4    |
| 1030 | 2 1   | 1    |
| 1040 | 2 1   | 1    |
| 1050 | 2 5   | 1    |
| 1100 | 1 1   | 7    |
| 1110 | 2 5   | 4,10 |
| 1120 | 2 5   | 4    |
| 1130 | 2 1   | 1    |
| 1140 | 2 3   | 1    |
| 1150 | 2 1   | 1    |
| 1200 | 2 1   | 1    |
| 1210 | 2 1   | 4,6  |
| 1220 | 2 1   | 5,6  |
| 1230 | 2 1   | 5,6  |
| 1240 | 2 1   | 1    |
| 1250 | 2 1   | 1    |
| 1300 | 2 1   | 1    |
| 1320 | 2 1   | 1    |
| 1330 | 2 1   | 1    |
| 1340 | 2 1   | 1    |
| 1350 | 2 1   | 1    |
| 1400 | 2 1   | 1    |
| 1410 | 2 1   | 1    |
| 1420 | 2 1   | 1    |
| 1430 | 2 1   | 1    |
| 1440 | 2 1   | 1    |
| 1450 | 1 3,5 | 7,12 |
| 1500 | 2 1   | 1    |
| 1510 | 2 1   | 1    |
| 1520 | 2 1   | 1    |
| 1530 | 2 1   | 1    |
| 1540 | 2 1   | 1    |
| 1550 | 2 1   | 1    |
| 1600 | 2 1   | 1    |
| 1620 | 2 1   | 1    |
| 1630 | 2 1   | 1    |
| 1640 | 2 1   | 1    |
| 1650 | 2 1   | 1    |
| 1700 | 2 1   | 1    |
| 800  | 3 1   | 7    |
| 810  | 3 1   | 7    |
| 820  | 3 1   | 7    |

|      |        |          |
|------|--------|----------|
| 830  | 3 1    | 7,15     |
| 840  | 3 1    | 1        |
| 850  | 2 1    | 5,7      |
| 900  | 2 1    | 4,7,15   |
| 910  | 2 3    | 4,7      |
| 920  | 2 1    | 7        |
| 930  | 2 1    | 4,7,15   |
| 940  | 2 1    | 7        |
| 950  | 2 1    | 7        |
| 1000 | 2 1    | 7        |
| 1010 | 2 1    | 7        |
| 1030 | 2 1    | 1        |
| 1040 | 2 1    | 1        |
| 1050 | 2 1    | 1        |
| 1100 | 2 1    | 1        |
| 1110 | 2 3,4  | 4,15     |
| 1120 | 2 1    | 1        |
| 1130 | 2 1    | 1        |
| 1140 | 2 3    | 4        |
| 1150 | 2 1    | 1        |
| 1200 | 2 3,5  | 4,7,9,15 |
| 1210 | 3 3    | 4,5,7    |
| 1220 | 3 3    | 5,7      |
| 1230 | 3 1    | 7        |
| 1240 | 3 1    | 7        |
| 1250 | 3 1    | 1        |
| 1300 | 3 1    | 7        |
| 1320 | 3 3    | 7        |
| 1330 | 3 3    | 7        |
| 1340 | 3 3    | 7        |
| 1350 | 3 1    | 7        |
| 1400 | 3 1    | 7        |
| 1410 | 3 1    | 7,15,16  |
| 1420 | 3 1    | 7,15,16  |
| 1430 | 2 10   | 4        |
| 1440 | 2 10   | 4        |
| 1450 | 2 10   | 4        |
| 1500 | 2 5,10 | 4        |
| 1510 | 2 10   | 4        |
| 1520 | 2 1    | 1        |
| 1530 | 2 1    | 1        |
| 1540 | 2 1    | 1        |
| 1550 | 2 1    | 1        |
| 1600 | 2 1    | 1        |
| 1620 | 2 1    | 15,16    |
| 1630 | 2 10   | 4        |
| 1640 | 2 10   | 4        |
| 1650 | 2 10   | 4        |
| 1700 | 2 10   | 4        |
| 800  |        | 17       |

|      |        |           |
|------|--------|-----------|
| 810  | 2 1    | 10,15,16  |
|      |        | 4,10,15,1 |
| 820  | 2 1    | 6         |
| 830  | 2 3    | 4,10      |
| 840  | 2 1    | 4,10      |
|      |        | 4,10,15,1 |
| 850  | 2 1    | 6         |
| 900  | 2 1    | 4         |
| 910  | 2 5    | 4         |
| 920  | 2 1    | 4         |
| 930  | 2 1    | 4,15,16   |
| 940  | 2 1    | 4         |
| 950  | 2 1    | 4,6       |
| 1000 | 2 1    | 13        |
| 1010 | 2 1    | 4,10      |
| 1030 | 2 2,3  | 4,10      |
| 1040 | 2 1    | 4,10      |
| 1050 | 2 1    | 4         |
| 1100 | 2 10   | 4,10      |
| 1110 | 2 10   | 4,10      |
|      |        | 4,10,15,1 |
| 1120 | 2 10   | 6         |
| 1130 | 2 10   | 10        |
|      |        | 4,10,15,1 |
| 1140 | 2 10   | 6         |
| 1150 | 10     | 17        |
| 1200 | 10     | 17        |
| 1210 | 10     | 17        |
| 1220 | 10     | 17        |
| 1230 | 10     | 17        |
| 1240 | 2 1    | 1         |
| 1250 | 2 10   | 4,10      |
| 1300 | 2 10   | 4         |
| 1320 | 2 5,10 | 4         |
| 1330 | 2 10   | 4         |
| 1340 | 2 10   | 4         |
| 1350 | 2 10   | 4         |
| 1400 | 2 10   | 4         |
| 1410 | 2 3,10 | 4         |
| 1420 | 9      | 17        |
| 1430 | 2 10   | 4         |
| 1440 | 3 1    | 13        |
| 1450 | 2 1    | 4,10      |
| 1500 | 2 1    | 4,10      |
| 1510 | 2 1    | 4         |
| 1520 | 2 1    | 4,10      |
| 1530 | 2 1    | 4         |
| 1540 | 2 1    | 4         |
| 1550 | 2 1    | 12        |
| 1600 | 2 1    | 4,10      |

|      |       |         |
|------|-------|---------|
| 1620 | 2 3   | 4,10    |
| 1630 | 2 1   | 4       |
| 1640 |       | 17      |
| 1650 | 2 1   | 4       |
| 1700 | 2 1   | 4       |
| 800  | 2 1   | 5,10    |
| 810  | 2 1   | 4,5,10  |
| 820  | 2 1   | 10      |
| 830  | 2 1   | 4,10    |
| 840  | 2 1   | 4,10    |
| 850  | 2 1   | 4,10    |
| 900  | 2 1   | 4,10    |
| 910  | 2 1   | 1       |
| 920  | 2 1   | 4,12    |
| 930  | 1 1   | 12      |
| 940  | 2 1   | 4,12    |
| 950  | 2 1   | 4,10    |
| 1000 | 2 1   | 4,10    |
| 1010 | 2 1   | 4,10    |
| 1020 | 2 1   | 4,10    |
| 1030 | 2 14  | 4,10    |
| 1040 | 2 14  | 4,10    |
| 1050 | 2 14  | 4,10    |
| 1100 | 2 8   | 4,10    |
| 1110 | 2 8   | 4,10    |
| 1120 | 2 14  | 4,10    |
| 1130 | 2 1   | 10      |
| 1140 | 2 1   | 10      |
| 1150 | 2 8   | 4,10    |
| 1200 | 2 8   | 4,10    |
| 1210 | 2 1   | 5,10    |
| 1220 | 2 1   | 4,10    |
| 1240 | 2 1   | 1       |
| 1250 | 2 1   | 1       |
| 1300 | 2 1   | 1       |
| 1310 | 2 1   | 1       |
| 1320 | 2 1   | 1       |
| 1330 | 2 1   | 4,10    |
| 1340 | 2 1   | 4,10    |
| 1350 | 2 1   | 4,10    |
| 1400 | 2 14  | 4,10    |
| 1410 | 2 12  | 4,10    |
| 1420 | 2 1   | 10      |
| 1430 | 2 1   | 10      |
| 1440 | 2 5,6 | 4,15,16 |
| 1450 | 2 1   | 13      |
| 1500 | 2 1   | 10      |
| 1510 | 2 1   | 10      |
| 1520 | 2 1   | 10      |
| 1530 | 2 1   | 1       |

|      |           |           |
|------|-----------|-----------|
| 1540 | 3 1       | 13        |
| 1550 | 2 1       | 10        |
| 1600 | 2 1       | 10        |
| 1620 | 2 1       | 10        |
| 1630 | 2 1       | 10        |
| 1640 | 2 1       | 10        |
| 1650 | 2 1       | 10        |
| 1700 | 2 1       | 10        |
| 800  | 2 1       | 5,10      |
| 810  | 2 1       | 5,10      |
| 820  | 1 1       | 12        |
|      |           | 4,10,15,1 |
| 830  | 2 1       | 6         |
| 840  | 2 1       | 10        |
| 850  | 2 1       | 1         |
| 900  | 2 1       | 1         |
| 910  | 2 1       | 1         |
| 920  | 3 1       | 13        |
| 930  | 2 7       | 4,10      |
| 940  | 2 7,12    | 4,15,16   |
| 950  | 2 7       | 4         |
| 1000 | 2 7       | 4         |
| 1010 | 2 8,12    | 4,10      |
| 1020 | 2 8,12    | 4,10      |
| 1030 | 2 8       | 4,10      |
| 1040 | 2 8       | 4,10      |
| 1050 | 2 8       | 4,10      |
| 1100 | 5 2,10,13 | 4,10      |
| 1110 | 5 10      | 4,10      |
| 1120 | 2 1       | 10        |
| 1130 | 2 14      | 4,10      |
| 1140 | 2 1       | 10        |
| 1150 | 2 1       | 12        |
| 1200 | 2 1       | 5,10      |
| 1210 | 2 1       | 5,10      |
| 1220 | 2 1       | 10        |
| 1240 | 2 1       | 1         |
| 1250 | 2 1       | 1         |
| 1300 | 2 1       | 1         |
| 1310 | 2 5       | 4,10      |
| 1320 | 1 1       | 12        |
| 1330 | 2 1       | 1         |
| 1340 | 2 1       | 1         |
| 1350 | 2 1       | 1         |
| 1400 | 2 12      | 4,10      |
| 1410 | 2 1       | 1         |
| 1420 |           | 17        |
| 1430 |           | 17        |
| 1440 |           | 17        |
| 1450 |           | 17        |

|      |      |           |
|------|------|-----------|
| 1500 |      | 17        |
| 1510 |      | 17        |
| 1520 |      | 17        |
| 1530 |      | 17        |
| 1540 |      | 17        |
| 1550 |      | 17        |
| 1600 |      | 17        |
| 1620 |      | 17        |
| 1630 |      | 17        |
| 1640 |      | 17        |
| 1650 |      | 17        |
| 1700 |      | 17        |
| 800  | 2 1  | 12,13     |
| 810  | 2 3  | 5,10      |
| 820  | 2 1  | 5,10      |
|      |      | 5,10,15,1 |
| 830  | 2 1  | 6         |
| 840  | 2 1  | 1         |
| 850  | 2 1  | 1         |
| 900  | 2 1  | 1         |
| 910  | 2 1  | 1         |
| 920  | 2 1  | 1         |
| 930  | 2 1  | 1         |
| 940  | 2 1  | 1         |
| 950  | 2 1  | 1         |
| 1000 | 2 1  | 1         |
| 1010 | 2 1  | 1         |
| 1020 | 2 1  | 1         |
| 1030 | 1 1  | 13        |
| 1040 | 2 1  | 10        |
| 1050 | 2 1  | 4,10      |
| 1100 | 2 1  | 4,15,16   |
| 1110 | 3 2  | 13        |
| 1120 | 2 1  | 4,10      |
| 1130 | 2 14 | 4,12      |
| 1140 | 2 1  | 1         |
| 1150 | 2 7  | 4,10      |
| 1200 | 2 1  | 4,5,10    |
| 1210 | 2 1  | 5,10      |
| 1220 | 2 1  | 10        |
| 1240 | 2 1  | 1         |
| 1250 | 2 1  | 1         |
| 1300 | 2 1  | 10        |
| 1310 | 2 2  | 4,10      |
| 1320 | 2 1  | 4,10      |
| 1330 | 2 1  | 1         |
| 1340 | 2 1  | 1         |
| 1350 | 2 1  | 1         |
| 1400 | 2 1  | 1         |
| 1410 | 2 10 | 4         |



|      |         |         |
|------|---------|---------|
| 1420 | 2 1     | 4,13    |
| 1430 | 2 1     | 1       |
| 1440 | 1 1     | 13      |
| 1450 | 2 1     | 4,15,16 |
| 1500 | 2 1     | 1       |
| 1510 | 2 1     | 1       |
| 1520 | 2 1     | 1       |
| 1530 | 2 1     | 13      |
| 1540 | 3 1     | 13      |
| 1550 | 2 1     | 1       |
| 1600 | 2 2     | 1       |
| 1620 | 2 1     | 1       |
| 1630 | 2 1     | 1       |
| 1640 | 2 1     | 1       |
| 1650 | 2 10    | 12      |
| 1700 | 2 10    | 12,13   |
| 800  | 2 1     | 1       |
| 810  | 2 1     | 1       |
| 820  | 2 1     | 1       |
| 830  | 2 5,6   | 4,15,16 |
| 840  | 2 5,6   | 4,15,16 |
| 850  | 2 3,5,6 | 4       |
| 900  | 2 1     | 1       |
| 910  | 2 1     | 1       |
| 920  | 2 1     | 1       |
| 930  | 2 1     | 1       |
| 940  | 2 1     | 1       |
| 950  | 2 1     | 1       |
| 1000 | 2 1     | 1       |
| 1010 | 2 1     | 1       |
| 1020 | 2 1     | 1       |
| 1030 | 2 1     | 1       |
| 1040 | 2 2,13  | 1       |
| 1050 | 2 1     | 1       |
| 1100 | 2 1     | 1       |
| 1110 | 2 1     | 1       |
| 1120 | 2 1     | 1       |
| 1130 | 2 1     | 1       |
| 1140 | 2 1     | 1       |
| 1150 | 2 1     | 1       |
| 1200 | 2 1     | 1       |
| 1210 | 1 1     | 1       |
| 1220 | 2 1     | 1       |
| 1240 | 2 1     | 1       |
| 1250 | 2 1     | 1       |
| 1300 | 2 1     | 1       |
| 1310 | 2 1     | 1       |
| 1320 | 2 1     | 1       |
| 1330 | 2 1     | 1       |
| 1340 | 2 1     | 1       |

|      |        |           |
|------|--------|-----------|
| 1350 | 2 1    | 1         |
| 1400 | 2 5,6  | 1         |
| 1410 | 2 5,6  | 1         |
| 1420 | 2 1    | 1         |
| 1430 | 2 1    | 1         |
| 1440 | 2 1    | 1         |
| 1450 | 2 1    | 1         |
| 1500 | 2 1    | 1         |
| 1510 | 2 1    | 1         |
| 1520 | 2 1    | 1         |
| 1530 | 2 1    | 1         |
| 1540 | 2 1    | 1         |
| 1550 | 2 1    | 1         |
| 1600 | 2 10   | 1         |
| 1620 | 2 10   | 1         |
| 1630 | 2 10   | 1         |
| 1640 | 2 1    | 1         |
| 1650 | 2 10   | 1         |
| 1700 | 2 10   | 1         |
|      |        | 5,10,15,1 |
| 800  | 2 1    | 6         |
|      |        | 5,10,15,1 |
| 810  | 2 1    | 6         |
|      |        | 5,10,15,1 |
| 820  | 2 1    | 6         |
| 830  | 1 1    | 12,15,16  |
| 840  | 1 1    | 12,15,16  |
| 850  | 2 1    | 12        |
| 900  | 3 1    | 10        |
| 910  | 5 1    | 4,10      |
| 920  | 2 8    | 4,10      |
| 930  | 2 8    | 4,10      |
|      |        | 4,10,15,1 |
| 940  | 5 1    | 6         |
|      |        | 4,10,15,1 |
| 950  | 5 1    | 6         |
| 1000 | 2 2,13 | 4,10      |
| 1010 | 2 1    | 1         |
| 1020 | 2 1    | 1         |
| 1030 | 2 1    | 1         |
| 1040 | 5 1    | 4,10      |
| 1050 | 2 7    | 4,12,13   |
| 1100 | 2 1    | 4,15,16   |
| 1110 | 2 1    | 1         |
| 1120 | 2 1    | 4         |
| 1130 | 5 1    | 4,10      |
| 1140 | 2 1    | 10        |
| 1150 | 2 7    | 4,10      |
| 1200 | 2 7    | 4,10      |
| 1210 | 2 1    | 5,10      |

|      |          |           |
|------|----------|-----------|
| 1220 | 2 1      | 5,10      |
| 1230 | 2 1      | 5,10      |
| 1250 | 2 1      | 1         |
| 1300 | 2 1      | 1         |
| 1310 | 2 1      | 1         |
| 1320 | 2 1      | 1         |
| 1330 | 2 1      | 1         |
| 1340 | 2 1      | 1         |
| 1350 | 2 1      | 1         |
| 1400 | 2 1      | 1         |
| 1410 | 5 1      | 10        |
| 1420 | 1 1      | 10,12,13  |
| 1430 | 2 1      | 10        |
| 1440 | 2 1      | 1         |
| 1450 | 2 1      | 1         |
| 1500 | 2 10     | 4,10      |
| 1510 | 2 10     | 4,10      |
| 1530 | 2 10     | 4,10      |
| 1540 | 2 10     | 4,10      |
| 1550 | 2 10     | 4         |
| 1600 | 2 10     | 4         |
| 1610 | 2 10     | 4         |
| 1620 | 2 10     | 4         |
| 1630 | 2 10     | 4         |
| 1640 | 2 10     | 4         |
| 1650 | 2 10     | 4         |
| 1700 | 2 10     | 4,10      |
| 800  | 2 1      | 1         |
| 810  | 2 1      | 1         |
| 820  | 2 1      | 5,6,15,16 |
| 830  | 2 1      | 5,6       |
| 840  | 2 1      | 1         |
| 850  | 2 5,6    | 7,9       |
| 900  | 1 5,6    | 7,15,16   |
| 910  | 1 5,6    | 4,7,15,16 |
| 920  | 1 5,6    | 4,7,15,16 |
| 930  | 2 1      | 1         |
| 940  | 2 1      | 1         |
| 950  | 2 1      | 1         |
| 1000 | 2 1      | 1         |
| 1010 | 2 2,3,13 | 4         |
| 1020 | 2 1      | 1         |
| 1030 | 2 1      | 1         |
| 1040 | 2 1      | 1         |
| 1050 | 2 1      | 1         |
| 1100 | 2 1      | 1         |
| 1110 | 2 1      | 1         |
| 1120 | 2 5      | 4,15      |
| 1130 | 2 1      | 1         |
| 1140 | 2 1      | 1         |

|      |        |           |
|------|--------|-----------|
| 1150 | 2 1    | 1         |
| 1200 | 2 1    | 1         |
| 1210 | 2 5,6  | 5,6       |
| 1220 | 2 5    | 5,7       |
| 1230 | 2 1    | 5,7       |
| 1250 | 2 1    | 7         |
| 1300 | 2 1    | 7         |
| 1310 | 2 5,6  | 11,15,16  |
| 1320 | 2 1    | 1         |
| 1330 | 2 1    | 1         |
| 1340 | 2 1    | 1         |
| 1350 | 2 1    | 1         |
| 1400 | 2 1    | 1         |
| 1410 | 2 1    | 1         |
| 1420 | 2 1    | 1         |
| 1430 | 2 1    | 1         |
| 1440 | 2 1    | 1         |
| 1450 | 2 1    | 1         |
| 1500 | 2 1    | 1         |
| 1510 | 2 1    | 1         |
| 1530 | 2 1    | 1         |
| 1540 | 2 1    | 1         |
| 1550 | 2 1    | 1         |
| 1600 | 2 1    | 1         |
| 1610 | 2 1    | 1         |
| 1620 | 2 1    | 1         |
| 1630 | 2 1    | 1         |
| 1640 | 2 1    | 1         |
| 1650 | 2 1    | 1         |
| 1700 | 2 1    | 1         |
|      |        | 5,10,15,1 |
| 800  | 2 1    | 6         |
|      |        | 5,10,15,1 |
| 810  | 2 1    | 6         |
| 820  | 2 1    | 1         |
| 830  | 2 1    | 1         |
| 840  | 2 1    | 1         |
| 850  | 2 1    | 1         |
| 900  | 2 3    | 9         |
| 910  | 2 1    | 15,16     |
| 920  | 2 1    | 15,16     |
| 930  | 2 1    | 1         |
| 940  | 2 2,13 | 4,10      |
| 950  | 2 2,13 | 4,10      |
| 1000 | 2 1    | 1         |
| 1010 | 2 1    | 1         |
| 1020 | 2 1    | 1         |
| 1030 | 2 1    | 1         |
| 1040 | 2 1    | 1         |
| 1050 | 2 8    | 4,10      |

|      |        |         |
|------|--------|---------|
| 1100 | 2 7    | 4,15,16 |
| 1110 | 1 1    | 12,13   |
| 1120 | 2 1    | 1       |
| 1130 | 2 1    | 1       |
| 1140 | 2 1    | 1       |
| 1150 | 2 1    | 1       |
| 1200 | 2 1    | 1       |
| 1210 | 2 1    | 5       |
| 1220 | 2 1    | 5,10    |
| 1230 | 2 1    | 5,10    |
| 1250 | 2 1    | 1       |
| 1300 | 2 1    | 1       |
| 1310 | 2 1    | 1       |
| 1320 | 2 1    | 1       |
| 1330 | 2 1    | 1       |
| 1340 | 2 1    | 1       |
| 1350 | 2 1    | 1       |
| 1400 | 2 1    | 1       |
| 1410 | 2 1    | 1       |
| 1420 | 2 1    | 1       |
| 1430 | 2 1    | 1       |
| 1440 | 2 1    | 1       |
| 1450 | 7      | 17      |
| 1500 | 7      | 17      |
| 1510 | 7      | 17      |
| 1530 | 7      | 17      |
| 1540 | 2 10   | 4       |
| 1550 | 2 10   | 4       |
| 1600 | 2 10   | 4       |
| 1610 | 2 10   | 4       |
| 1620 | 2 1    | 13      |
| 1630 | 1 1    | 13      |
| 1640 | 2 1    | 10      |
| 1650 | 2 1    | 1       |
| 1700 | 2 1    | 10      |
| 800  | 1 1    | 12      |
| 810  | 1 1    | 12      |
| 820  | 2 1    | 1       |
| 830  | 2 1    | 1       |
| 840  | 2 1    | 1       |
| 850  | 2 1    | 1       |
| 900  | 2 1    | 4       |
| 910  | 2 1    | 4       |
| 920  | 2 1    | 1       |
| 930  | 2 1    | 1       |
| 940  | 2 1    | 1       |
| 950  | 2 1    | 1       |
| 1000 | 2 2,13 | 4,10    |
| 1010 | 2 1    | 1       |
| 1020 | 2 5    | 15      |

|      |       |         |
|------|-------|---------|
| 1030 | 2 1   | 1       |
| 1040 | 2 1   | 1       |
| 1050 | 2 1   | 1       |
| 1100 | 2 1   | 12,13   |
| 1110 | 2 1   | 1       |
| 1120 | 2 1   | 1       |
| 1130 | 2 1   | 1       |
| 1140 | 2 1   | 1       |
| 1150 | 2 1   | 1       |
| 1200 | 2 10  | 4,10    |
| 1210 | 2 10  | 5       |
| 1220 | 2 10  | 5,10    |
| 1230 | 2 10  | 5,10    |
| 1250 | 2 10  | 4       |
| 1300 | 2 10  | 4       |
| 1310 |       | 17      |
| 1320 |       | 17      |
| 1330 |       | 17      |
| 1340 |       | 17      |
| 1350 |       | 17      |
| 1400 |       | 17      |
| 1410 |       | 17      |
| 1420 |       | 17      |
| 1430 |       | 17      |
| 1440 |       | 17      |
| 1450 |       | 17      |
| 1500 |       | 17      |
| 1510 |       | 17      |
| 1530 |       | 17      |
| 1540 |       | 17      |
| 1550 |       | 17      |
| 1600 |       | 17      |
| 1610 |       | 17      |
| 1620 |       | 17      |
| 1630 |       | 17      |
| 1640 |       | 17      |
| 1650 |       | 17      |
| 1700 |       | 17      |
| 800  | 2 1   | 1       |
| 810  | 2 1   | 1       |
| 820  | 2 1   | 1       |
| 830  | 2 1   | 1       |
| 840  | 2 1   | 1       |
| 850  | 2 1   | 1       |
| 900  | 2 5   | 1       |
| 910  | 2 5   | 1       |
| 920  | 2 5   | 1,15,16 |
| 930  | 2 5,6 | 1,15,16 |
| 940  | 2 1   | 1       |
| 950  | 2 1   | 1       |

|      |         |   |
|------|---------|---|
| 1000 | 2 1     | 1 |
| 1010 | 2 2,13  | 1 |
| 1020 | 2 1     | 1 |
| 1030 | 2 5     | 1 |
| 1040 | 2 5     | 1 |
| 1050 | 2 1     | 1 |
| 1100 | 2 1     | 1 |
| 1110 | 2 1     | 1 |
| 1120 | 2 1     | 1 |
| 1130 | 2 1     | 1 |
| 1140 | 2 2,3,5 | 1 |
| 1150 | 2 2,3,5 | 1 |
| 1200 | 2 1     | 1 |
| 1210 | 2 3     | 1 |
| 1220 | 2 1     | 1 |
| 1230 | 2 1     | 1 |
| 1250 | 2 1     | 1 |
| 1300 | 2 1     | 1 |
| 1310 | 2 1     | 1 |
| 1320 | 2 1     | 1 |
| 1330 | 2 1     | 1 |
| 1340 | 2 1     | 1 |
| 1350 | 2 1     | 1 |
| 1400 | 2 3,5,6 | 1 |
| 1410 | 2 7,8   | 1 |
| 1420 | 2 1     | 1 |
| 1430 | 2 1     | 1 |
| 1440 | 2 1     | 1 |
| 1450 | 2 1     | 1 |
| 1500 | 2 1     | 1 |
| 1510 | 2 1     | 1 |
| 1530 | 2 1     | 1 |
| 1540 | 2 1     | 1 |
| 1550 | 2 1     | 1 |
| 1600 | 2 1     | 1 |
| 1610 | 2 1     | 1 |
| 1620 | 2 1     | 1 |
| 1630 | 2 1     | 1 |
| 1640 | 2 1     | 1 |
| 1650 | 2 1     | 1 |
| 1700 | 2 1     | 1 |
