# Supplementary material for: A comparative study of patients’ activities and interactions in a stroke unit before and after reconstruction—The significance of the built environment
Source: PubMed Central journal article supplement (PMC5519004; doi:10.1371/journal.pone.0177477), 2017-07-20
Supplement: pone.0177477.s003.pdf [file pone.0177477.s003.pdf]

| TIME | Location | People | Activity | Location | People | Activity  | Location | People |    |
|------|----------|--------|----------|----------|--------|-----------|----------|--------|----|
| 800  |          | 2 5,6  |          | 1        | 2      | 1         | 1        | 2      | 1  |
| 810  |          | 2      | 5        | 1        | 1      | 8 12,15   |          | 2      | 1  |
| 820  |          | 2      | 3 4,12   |          | 2      | 8 7,15,16 |          | 2      | 1  |
| 830  |          | 5      | 1 4,7    |          | 5      | 1 4,7     |          | 2      | 3  |
| 840  |          | 2      | 3 4,5,7  |          | 2      | 1         | 7        | 5      | 1  |
| 850  |          | 2      | 1        | 7        | 5      | 1 4,5,7   |          | 5      | 1  |
| 900  |          | 2      | 1        | 7        | 2      | 1         | 7        | 5      | 1  |
| 910  |          | 2      | 1        | 7        | 2      | 1         | 7        | 5      | 1  |
| 920  |          | 2      | 1        | 7        | 2      | 1         | 7        | 5      | 1  |
| 930  |          | 2      | 1 4,6    |          | 2      | 1         | 1        | 2      | 1  |
| 940  |          | 2      | 1 1,7    |          | 2      | 1         | 1        | 2      | 1  |
| 950  |          | 2      | 1 1,7    |          | 2      | 1         | 1        | 2      | 1  |
| 1000 |          | 2      | 1        | 7        | 2      | 1         | 1        | 2      | 1  |
| 1010 |          | 2      | 1        | 1        | 2      | 1         | 1        | 2      | 1  |
| 1020 |          | 2      | 1 4,7    |          | 2      | 1         | 1        | 2      | 1  |
| 1030 |          | 2      | 5 4,7    |          | 2      | 1         | 1        | 2      | 1  |
| 1040 |          | 2      | 1        | 1        | 2      | 1         | 1        | 2      | 1  |
| 1050 |          | 2      | 1        | 1        | 2      | 1         | 1        | 2      | 1  |
| 1100 |          | 2      | 1        | 1        | 2      | 1         | 4        | 2      | 1  |
| 1110 |          | 2      | 1        | 1        | 2      | 13 4,6    |          | 2      | 1  |
| 1120 |          | 1 3,5  |          | 13       | 2      | 13 4,6    |          | 2      | 1  |
| 1130 |          | 2      | 1        | 1        | 2      | 1         | 1        | 2      | 1  |
| 1140 |          |        |          |          |        |           |          |        |    |
| 1150 |          | 2      | 8 4,7    |          | 5      | 1 5,7     |          | 5      | 1  |
| 1200 |          | 2      | 1 4,7    |          | 5      | 1 5,7     |          | 5      | 1  |
| 1210 |          | 3      | 4        | 13       | 5      | 1 5,7     |          | 5      | 1  |
| 1220 |          | 5      | 1        | 5        | 5      | 1         | 5        | 5      | 5  |
| 1230 |          | 5      | 1 5,7    |          | 5      | 1 4,5,7   |          | 5      | 1  |
| 1240 |          | 2      | 1 4,7    |          | 2      | 1         | 7        | 2      | 1  |
| 1250 |          | 2      | 1        | 1        | 2      | 5         | 1        | 2      | 10 |
| 1300 |          | 2      | 1 4,7    |          | 2      | 1         | 1        | 2      | 10 |
| 1310 |          | 2      | 1 4,7    |          | 2      | 1         | 1        | 2      | 10 |
| 1320 |          | 2      | 1        | 7        | 2      | 1         | 1        | 2      | 1  |
| 1330 |          | 2      | 1        | 7        | 2      | 1         | 1        | 2      | 1  |
| 1340 |          | 2      | 1 4,7    |          | 2      | 1         | 1        | 2      | 1  |
| 1350 |          | 2      | 1        | 7        | 2      | 1         | 1        | 2      | 1  |
| 1400 |          | 2      | 1        | 1        | 2      | 1         | 1        | 2      | 7  |
| 1410 |          | 2      | 1        | 1        | 2      | 1         | 1        | 2      | 1  |
| 1420 |          | 2      | 1        | 7        | 2      | 1         | 1        | 2      | 1  |
| 1430 |          | 2      | 1        | 7        | 2      | 1         | 1        | 2      | 1  |
| 1440 |          | 2      | 1        | 1        | 2      | 1         | 1        | 2      | 1  |
| 1450 |          | 2      | 1        | 1        | 2      | 7         | 13       | 2      | 1  |
| 1500 |          | 2      | 1        | 1        | 2      | 5         | 7        | 2      | 1  |
| 1510 |          | 2      | 1        | 1        | 2      | 1         | 6        | 2      | 1  |
| 1520 |          | 2      | 1        | 1        | 3      | 10 4,13   |          | 2      | 1  |
| 1530 |          | 2      | 1 5,7    |          | 2      | 1 5,7     |          | 2      | 1  |
| 1540 |          | 2      | 1 5,7    |          | 2      | 1 5,7     |          | 2      | 1  |
| 1550 |          | 2      | 1        | 7        | 2      | 1         | 7        | 2      | 1  |
| 1600 |          | 2      | 1        | 7        | 5      | 1 5,7     |          | 2      | 1  |

|      |         |             |    |   |             |    |   |   |
|------|---------|-------------|----|---|-------------|----|---|---|
| 1610 | 2       | 3           | 7  | 2 | 1 5,7       |    | 2 | 1 |
| 1620 | 2       | 1           | 7  | 3 | 7           | 13 | 2 | 1 |
| 1630 | 2       | 1           | 7  | 3 | 7           | 13 | 2 | 1 |
| 1640 | 2       | 1           | 7  | 2 | 1           | 7  | 2 | 1 |
| 1650 | 2       | 5 5,7       |    | 1 | 1           | 17 | 2 | 1 |
| 1700 | 2       | 1           | 7  | 1 | 1           | 17 | 2 | 1 |
| 800  | 2       | 1           | 1  | 2 | 1           | 1  | 2 | 1 |
| 810  | 2       | 1           | 1  | 2 | 1           | 1  | 2 | 1 |
| 820  | 2 5,6   | 4,6         |    | 2 | 1           | 1  | 2 | 1 |
| 830  | 1 5,6   |             | 17 | 2 | 1 5,6       |    | 2 | 1 |
| 840  | 2 5,6   | 4,8         |    |   |             |    | 2 | 1 |
| 850  | 2 3,4,5 | 4,7         |    | 2 | 1           | 1  | 5 | 1 |
| 900  | 2       | 1 5,6       |    | 2 | 1 5,6       |    | 5 | 1 |
| 910  | 5       | 1 5,7       |    | 2 | 1           | 1  | 2 | 1 |
| 920  | 2       | 1           | 7  | 2 | 1           | 1  | 2 | 1 |
| 930  | 2       | 1           | 7  | 2 | 1           | 1  | 2 | 1 |
| 940  | 2       | 5 5,7       |    | 2 | 1           | 1  | 2 | 1 |
| 950  | 2       | 1 4,7       |    | 2 | 1           | 1  | 2 | 1 |
| 1000 | 2       | 5           | 7  | 2 | 1           | 1  | 2 | 8 |
| 1010 | 2       | 1 1,7       |    | 2 | 7 7,15,16   |    | 2 | 1 |
| 1020 | 2       | 1           | 1  | 2 | 1           | 7  | 2 | 7 |
| 1030 | 2       | 1 1,4       |    | 2 | 1           | 1  | 2 | 2 |
| 1040 | 2       | 3           | 1  | 5 | 1           | 7  | 2 | 1 |
| 1050 | 2       | 1           | 1  | 5 | 1           | 7  | 2 | 1 |
| 1100 | 2       | 1           | 1  | 5 | 1           | 7  | 7 | 5 |
| 1110 | 2       | 1           | 1  | 5 | 1           | 7  | 7 | 5 |
| 1120 | 2       | 7 4,6,15,16 |    | 5 | 1           | 7  | 3 | 1 |
| 1130 | 2       | 1           | 1  | 2 | 1           | 7  | 2 | 1 |
| 1140 | 2       | 1           | 1  | 2 | 1 1,7       |    | 2 | 1 |
| 1150 | 2       | 1           | 1  | 2 | 1           | 7  | 9 | 5 |
| 1200 | 2       | 1           | 1  | 2 | 1           | 1  | 9 | 5 |
| 1210 | 2       | 1           | 1  | 5 | 1 5,7       |    | 9 | 5 |
| 1220 | 2       | 1 5,6       |    | 5 | 1 5,7       |    | 9 | 5 |
| 1230 |         |             |    |   |             |    |   |   |
| 1240 | 2       | 1           | 1  | 5 | 1 5,7       |    | 2 | 1 |
| 1250 | 1 3,4   |             | 7  | 5 | 1 4,7       |    | 2 | 1 |
| 1300 | 2       | 5 5,6       |    |   |             |    | 2 | 1 |
| 1310 | 2       | 1           | 1  | 2 | 8 4,7       |    | 2 | 1 |
| 1320 | 2       | 1           | 1  | 2 | 8 4,6,15,16 |    | 2 | 1 |
| 1330 | 2       | 1           | 1  | 2 | 1           | 1  | 2 | 1 |
| 1340 | 2       | 1           | 1  | 2 | 1           | 1  | 2 | 1 |
| 1350 | 2       | 3 1,4       |    | 2 | 1           | 1  | 2 | 1 |
| 1400 | 2       | 1           | 1  | 2 | 1           | 1  | 2 | 1 |
| 1410 | 2       | 1           | 1  | 2 | 1           | 1  | 2 | 1 |
| 1420 | 2       | 1           | 1  | 2 | 1           | 1  | 2 | 1 |
| 1430 | 2       | 1           | 1  | 2 | 1           | 1  | 2 | 1 |
| 1440 | 2 5,6   | 4,6,9       |    | 2 | 1           | 1  | 2 | 1 |
| 1450 | 2       | 1           | 1  | 2 | 1           | 1  | 2 | 1 |
| 1500 | 2       | 1           | 1  | 2 | 1           | 1  | 2 | 1 |
| 1510 | 2       | 1           | 1  | 2 | 1           | 1  | 3 | 7 |

|      |           |         |    |   |            |    |        |    |
|------|-----------|---------|----|---|------------|----|--------|----|
| 1520 | 2         | 1       | 1  | 2 | 1          | 1  | 3      | 7  |
| 1530 | 2         | 1       | 1  | 2 | 1          | 1  | 3      | 7  |
| 1540 | 2         | 1       | 1  | 2 | 1          | 1  | 2      | 10 |
| 1550 | 2         | 1       | 1  | 2 | 1          | 1  | 2      | 10 |
| 1600 | 2         | 1       | 1  | 2 | 1          | 1  | 2      | 10 |
| 1610 | 2         | 4       | 1  | 2 | 1          | 1  | 2      | 10 |
| 1620 | 2         | 1       | 1  | 2 | 1          | 1  | 2 5,10 |    |
| 1630 | 2         | 1       | 1  | 2 | 1          | 1  | 2      | 10 |
| 1640 | 2         | 1       | 1  | 2 | 1          | 1  | 2      | 10 |
| 1650 | 1         | 5       | 17 | 2 | 1          | 1  | 2      | 10 |
| 1700 | 2 5,6     |         | 7  | 2 | 1          | 1  | 2      | 10 |
| 800  | 2         | 5 1,4   |    | 2 | 1          | 1  | 2      | 5  |
| 810  | 2         | 5       | 6  | 2 | 1          | 1  | 2      | 5  |
| 820  | 5         | 1 5,7   |    | 5 | 1 5,7      |    | 2      | 1  |
| 830  | 5         | 1 5,7   |    | 5 | 1          | 7  | 2      | 1  |
| 840  | 5         | 1 5,7   |    | 5 | 1 5,7      |    | 2      | 1  |
| 850  | 3         | 1 11,13 |    | 5 | 1          | 7  | 2 3,10 |    |
| 900  | 2         | 1       | 7  | 2 | 1          | 7  | 6 2,10 |    |
| 910  | 2         | 1       | 7  | 2 | 1          | 7  | 6 2,10 |    |
| 920  | 2         | 1       | 1  | 2 | 1          | 7  | 2      | 1  |
| 930  | 2         | 1       | 1  | 2 | 1          | 7  | 2      | 1  |
| 940  | 2         | 1       | 1  | 2 | 1          | 7  | 2      | 1  |
| 950  | 2         | 1       | 1  | 3 | 7 4,13     |    | 2      | 10 |
| 1000 | 2         | 1       | 1  | 4 | 7 11,13    |    | 2      | 1  |
| 1010 | 2         | 7 11,12 |    | 4 | 7 11,12,13 |    | 2      | 10 |
| 1020 | 2         | 1       | 1  | 4 | 7          | 12 | 2      | 1  |
| 1030 | 2         | 1       | 1  | 2 | 1          | 1  | 2      | 10 |
| 1040 | 2         | 10 4,6  |    | 2 | 1          | 1  | 9      | 10 |
| 1050 | 2         | 10 4,6  |    | 2 | 1          | 1  | 9      | 10 |
| 1100 | 2         | 10      | 7  | 2 | 1          | 1  | 9      | 10 |
| 1110 | 2         | 10      | 7  | 2 | 1          | 1  | 9      | 10 |
| 1120 |           |         |    |   |            |    |        |    |
| 1130 | 2         | 1       | 7  | 2 | 8 4,6      |    | 2      | 1  |
| 1140 | 2         | 10 4,7  |    | 2 | 1 1,4      |    | 2      | 1  |
| 1150 | 2         | 1       | 7  | 2 | 1          | 1  | 2      | 5  |
| 1200 | 6 3,10,13 | 4,7     |    | 2 | 1          | 1  | 2      | 1  |
| 1210 | 6 3,10,13 |         | 7  | 2 | 1          | 7  | 2      | 1  |
| 1220 | 6 3,10,13 | 4,7     |    | 2 | 1          | 1  | 2      | 1  |
| 1230 | 3         | 10      | 13 | 2 | 1          | 1  | 2      | 1  |
| 1240 | 5         | 1 5,7   |    | 2 | 1          | 1  | 2      | 1  |
| 1250 | 3         | 1       | 13 | 2 | 1          | 1  | 2      | 1  |
| 1300 | 2         | 1       | 1  | 2 | 1          | 1  | 2      | 1  |
| 1310 | 2         | 1       | 1  | 2 | 1          | 1  | 2      | 1  |
| 1320 | 2         | 1       | 1  | 2 | 1          | 1  | 2      | 1  |
| 1330 | 1         | 1       | 17 | 2 | 1          | 1  | 2      | 1  |
| 1340 | 2         | 1       | 1  | 2 | 1          | 1  | 2      | 1  |
| 1350 | 1         | 1       | 13 | 1 | 1          | 1  | 2      | 1  |
| 1400 | 2         | 1       | 7  | 2 | 1          | 1  | 2      | 1  |
| 1410 | 3         | 1       | 13 | 1 | 1          | 1  | 1      | 1  |
| 1420 | 2         | 1       | 7  | 2 | 1          | 1  | 2      | 1  |

|      |   |         |    |   |       |   |   |   |
|------|---|---------|----|---|-------|---|---|---|
| 1430 | 2 | 1       | 7  | 2 | 1     | 1 | 2 | 1 |
| 1440 | 2 | 1       | 7  | 2 | 1     | 1 | 2 | 1 |
| 1450 | 2 | 1       | 1  | 2 | 1     | 1 | 2 | 1 |
| 1500 | 2 | 1       | 1  | 2 | 1     | 1 | 2 | 1 |
| 1510 | 5 | 1 5,7   |    | 5 | 1 5,7 |   | 2 | 1 |
| 1520 | 2 | 1       | 1  | 2 | 1     | 1 | 2 | 1 |
| 1530 | 2 | 1       | 1  | 2 | 1     | 1 | 2 | 1 |
| 1540 | 2 | 1       | 1  | 2 | 1     | 1 | 2 | 1 |
| 1550 | 2 | 1       | 1  | 2 | 1     | 1 | 2 | 1 |
| 1600 | 2 | 1       | 1  | 2 | 1     | 1 | 2 | 1 |
| 1610 | 2 | 1       | 1  | 2 | 1     | 1 | 2 | 1 |
| 1620 | 2 | 1 1,3   |    | 2 | 5 1,4 |   | 2 | 1 |
| 1630 | 3 | 1       | 13 | 2 | 1     | 1 | 2 | 1 |
| 1640 | 5 | 1 5,7   |    | 5 | 1 5,7 |   | 2 | 1 |
| 1650 | 5 | 1 4,5,7 |    | 5 | 1 5,7 |   | 2 | 1 |
| 1700 | 2 | 1       | 7  | 5 | 1     | 7 | 2 | 1 |



|      |    |   |       |    |   |        |   |
|------|----|---|-------|----|---|--------|---|
|      | 1  | 2 | 1     | 1  | 2 | 10     | 7 |
|      | 1  | 2 | 1     | 1  | 2 | 1      | 1 |
|      | 1  | 2 | 1     | 1  | 2 | 1      | 1 |
|      | 1  | 2 | 1     | 1  | 2 | 1      | 1 |
|      | 1  | 2 | 1     | 1  | 2 | 1      | 1 |
|      | 1  | 2 | 1     | 1  | 2 | 10 1,4 |   |
|      | 1  | 2 | 1     | 6  | 2 | 1      | 1 |
|      | 1  | 2 | 1 5,6 |    | 2 | 5 1,4  |   |
|      | 1  | 2 | 3 5,6 |    | 2 | 5      | 7 |
|      | 1  | 1 | 1     | 17 | 2 | 5      | 7 |
| 5,6  |    | 2 | 1     | 1  | 5 | 5 5,7  |   |
|      | 5  | 2 | 1     | 1  | 2 | 1      | 1 |
| 5,7  |    | 2 | 1     | 6  | 5 | 5      | 7 |
| 4,7  |    | 2 | 1     | 6  | 5 | 1 5,7  |   |
| 4,7  |    | 2 | 1     | 1  | 5 | 1 5,7  |   |
| 4,7  |    | 2 | 1     | 1  | 5 | 1      | 7 |
|      | 6  | 2 | 1 5,6 |    | 5 | 1      | 7 |
|      | 1  | 2 | 1     | 1  | 5 | 1      | 7 |
| 4,7  |    | 2 | 1     | 1  | 5 | 1      | 7 |
| 4,6  |    | 2 | 1     | 1  | 2 | 1      | 7 |
| 1,4  |    | 2 | 1     | 1  | 3 | 1      | 7 |
| 4,6  |    | 2 | 1     | 1  | 3 | 1      | 7 |
|      | 1  | 2 | 1     | 1  | 3 | 1      | 7 |
|      | 1  | 2 | 1     | 1  | 3 | 1      | 7 |
| 17   |    | 2 | 1     | 1  | 2 | 1      | 7 |
| 17   |    | 2 | 1     | 1  | 2 | 1      | 7 |
| 13   |    | 2 | 1     | 1  | 2 | 3 4,6  |   |
|      | 4  | 2 | 9     | 1  | 2 | 1      | 1 |
| 4,7  |    | 2 | 1     | 6  | 2 | 1      | 1 |
|      | 17 | 2 | 1     | 1  | 2 | 1      | 1 |
|      | 17 | 2 | 1     | 1  | 2 | 1      | 1 |
|      | 17 | 2 | 1     | 1  | 2 | 3      | 7 |
|      | 17 | 2 | 1     | 1  | 5 | 5 5,7  |   |
|      | 1  | 2 | 1 5,6 |    | 2 | 1      | 7 |
| 5,6  |    | 2 | 1     | 1  | 5 | 1 5,7  |   |
|      | 1  | 2 | 1     | 1  | 5 | 1      | 7 |
|      | 1  | 2 | 1     | 1  | 2 | 1      | 7 |
|      | 1  | 2 | 1     | 1  | 2 | 1      | 7 |
|      | 1  | 2 | 1     | 1  | 3 | 1      | 7 |
|      | 1  | 2 | 1     | 1  | 3 | 1      | 7 |
|      | 1  | 2 | 1     | 1  | 3 | 1      | 7 |
|      | 1  | 2 | 1     | 1  | 3 | 1      | 7 |
|      | 1  | 2 | 1     | 1  | 2 | 1      | 1 |
|      | 1  | 2 | 1     | 1  | 2 | 1      | 1 |
|      | 1  | 2 | 1     | 1  | 2 | 1      | 1 |
| 4,7  |    | 2 | 1     | 1  | 2 | 1      | 1 |
|      | 1  | 2 | 1     | 1  | 2 | 1      | 1 |
|      | 1  | 2 | 1     | 1  | 2 | 1      | 1 |
| 4,13 |    | 2 | 1     | 1  | 2 | 5      | 6 |

|       |    |        |          |   |   |        |    |
|-------|----|--------|----------|---|---|--------|----|
|       | 13 | 2      | 1        | 1 | 2 | 1      | 1  |
| 4,12  |    | 2      | 1        | 1 | 2 | 1      | 1  |
| 4,7   |    | 5      | 10 4,5,7 |   | 2 | 1      | 1  |
| 4,7   |    | 2      | 10 4,6   |   | 2 | 1      | 1  |
| 4,7   |    | 2      | 10 4,6   |   | 2 | 1      | 1  |
| 4,7   |    | 2      | 10 4,6   |   | 2 | 1      | 1  |
| 4,5,7 |    | 5      | 10 5,7   |   | 2 | 1      | 1  |
| 5,7   |    | 5      | 1        | 5 | 2 | 1      | 1  |
|       | 1  | 2      | 1        | 1 | 2 | 10 4,6 |    |
| 1,4   |    | 2      | 1        | 1 | 2 | 10 4,6 |    |
| 1,4   |    | 2      | 1        | 1 | 2 | 10 4,6 |    |
|       | 1  | 2      | 1        | 1 | 2 | 1      | 1  |
|       | 6  | 2      | 1        | 1 | 2 | 1      | 1  |
| 5,7   |    | 2      | 1        | 1 | 2 | 1 5,7  |    |
|       | 7  | 2      | 1        | 1 | 2 | 1      | 7  |
| 5,7   |    | 2      | 1        | 1 | 2 | 1      | 7  |
| 4,7   |    | 2      | 5 4,9    |   | 2 | 1      | 7  |
| 4,7   |    | 2      | 1        | 1 | 2 | 1      | 7  |
| 4,7   |    | 2      | 1        | 1 | 2 | 1      | 7  |
|       | 7  | 2      | 1        | 1 | 2 | 1      | 1  |
|       | 7  | 2      | 1        | 1 | 2 | 1      | 1  |
|       | 1  | 2      | 1        | 6 | 1 | 1      | 13 |
|       | 1  | 2      | 1        | 1 | 2 | 1      | 1  |
|       | 1  | 2      | 1        | 1 | 2 | 1      | 1  |
| 4,7   |    | 2      | 3 1,4    |   | 2 | 1      | 1  |
|       | 1  | 2      | 1        | 1 | 2 | 1      | 7  |
|       | 7  | 1      | 10       | 7 | 2 | 1      | 1  |
|       | 17 | 2 3,10 | 1,4      |   | 2 | 1      | 1  |
|       | 17 | 2      | 10       | 6 | 2 | 1      | 1  |
|       | 17 | 2      | 10 4,9   |   | 1 | 1      | 17 |
|       | 17 | 2      | 10 1,4   |   | 2 | 1      | 7  |
| 7,15  |    | 2      | 1        | 6 | 2 | 1      | 7  |
|       | 7  | 2      | 1        | 6 | 2 | 1      | 7  |
|       | 12 | 2      | 8 4,7    |   | 2 | 1      | 7  |
|       | 7  | 2      | 8 4,7    |   | 2 | 1      | 7  |
|       | 7  | 2      | 8 4,7    |   | 2 | 1      | 7  |
|       | 1  | 2      | 1 5,7    |   | 2 | 1      | 1  |
|       | 1  | 2      | 1 5,7    |   | 2 | 5 5,7  |    |
|       | 1  | 2      | 1 5,7    |   | 2 | 1 5,7  |    |
|       | 7  | 2      | 1        | 1 | 2 | 1 5,7  |    |
|       | 7  | 2      | 1        | 7 | 2 | 1      | 1  |
|       | 7  | 2      | 1        | 7 | 2 | 1      | 1  |
|       | 7  | 2      | 1        | 7 | 2 | 1      | 1  |
|       | 1  | 2      | 1        | 1 | 2 | 1      | 1  |
|       | 1  | 2      | 1        | 1 | 2 | 1      | 1  |
|       | 1  | 2      | 1        | 1 | 2 | 1      | 1  |
|       | 1  | 2      | 1        | 1 | 2 | 1      | 1  |
|       | 1  | 1      | 1        | 1 | 1 | 1      | 1  |
|       | 1  | 2      | 1        | 7 | 2 | 1      | 7  |

|     |   |   |       |   |   |           |    |
|-----|---|---|-------|---|---|-----------|----|
|     | 1 | 2 | 1     | 7 | 2 | 1         | 7  |
|     | 1 | 2 | 1     | 7 | 2 | 1         | 7  |
|     | 1 | 2 | 1     | 1 | 4 | 7 4,11,13 |    |
|     | 1 | 2 | 1     | 1 | 4 | 7 5,13    |    |
|     | 1 | 2 | 1 5,7 |   | 2 | 1 5,7     |    |
|     | 1 | 2 | 1     | 7 | 2 | 1         | 7  |
|     | 1 | 2 | 1     | 1 | 1 | 1         | 17 |
|     | 1 | 2 | 1     | 7 | 2 | 1         | 7  |
|     | 1 | 2 | 1     | 7 | 2 | 1         | 7  |
|     | 1 | 2 | 1     | 7 | 2 | 1         | 7  |
|     | 1 | 2 | 1     | 7 | 2 | 1         | 7  |
|     | 1 | 2 | 1     | 7 | 2 | 1         | 7  |
|     | 1 | 2 | 1     | 7 | 2 | 1         | 7  |
|     | 1 | 2 | 1 5,7 |   | 2 | 1 5,7     |    |
| 5,7 |   | 2 | 1 5,7 |   | 2 | 1 5,7     |    |
|     | 7 | 2 | 1 5,7 |   | 2 | 1 5,7     |    |
